1 **Structure of nucleosome-bound human PBAF complex**

2 Li Wang<sup>1,2,3\*</sup>, Jiali Yu<sup>1\*</sup>, Zishuo Yu<sup>1\*</sup>, Qianmin Wang<sup>1\*</sup>, Wanjun Li<sup>1</sup>, Yulei Ren<sup>1</sup>, Zhenguo Chen<sup>1,4†</sup>,  
3 Shuang He<sup>1†</sup>, and Yanhui Xu<sup>1,2,3†</sup>

4 <sup>1</sup>Fudan University Shanghai Cancer Center, Institutes of Biomedical Sciences, State Key Laboratory  
5 of Genetic Engineering and Shanghai Key Laboratory of Medical Epigenetics, Shanghai Medical  
6 College of Fudan University, Shanghai 200032, China.

7 <sup>2</sup>The International Co-laboratory of Medical Epigenetics and Metabolism, Ministry of Science and  
8 Technology, China, Department of Systems Biology for Medicine, School of Basic Medical Sciences,  
9 Shanghai Medical College of Fudan University, Shanghai 200032, China.

10 <sup>3</sup>Human Phenome Institute, Collaborative Innovation Center of Genetics and Development, School of  
11 Life Sciences, Fudan University, Shanghai 200433, China

12 <sup>4</sup>The Fifth People's Hospital of Shanghai, Shanghai Institute of Infectious Disease and Biosecurity,  
13 Shanghai Key Laboratory of Medical Epigenetics, and Institutes of Biomedical Sciences, Fudan  
14 University, Shanghai 200032, China

15 \* These authors contributed equally to this work.

16 † To whom correspondence should be addressed. E-mail: [xuyh@fudan.edu.cn](mailto:xuyh@fudan.edu.cn), [hes@fudan.edu.cn](mailto:hes@fudan.edu.cn),  
17 and [zhenguo chen@fudan.edu.cn](mailto:zhenguo chen@fudan.edu.cn)

18 **Abstract**

19 BAF and PBAF are mammalian SWI/SNF family chromatin remodeling complexes that possess  
20 multiple histone/DNA-binding subunits and create nucleosome-depleted/free regions for transcription  
21 activation. Despite structural studies of nucleosome-bound human BAF and yeast SWI/SNF family  
22 complexes, it remains elusive how PBAF-nucleosome complex is organized. Here we determined  
23 structure of 13-subunit human PBAF in complex with acetylated nucleosome in ADP-BeF<sub>3</sub>-bound  
24 state. Four PBAF-specific subunits work together with nine BAF/PBAF-shared subunits to generate  
25 PBAF-specific modular organization, distinct from that of BAF at various regions. PBAF-nucleosome  
26 structure reveals six histone-binding domains and four DNA-binding domains/modules, the majority  
27 of which directly bind histone/DNA. This multivalent nucleosome-binding pattern, not observed in  
28 previous studies, suggests that PBAF may integrate comprehensive chromatin information to target  
29 genomic loci for function. Our study reveals molecular organization of subunits and histone/DNA-  
30 binding domains/modules in PBAF-nucleosome complex and provides a framework to understand  
31 chromatin targeting of SWI/SNF family complexes.

## 32 **Introduction**

33 The adenosine triphosphate (ATP)-dependent chromatin remodeling complexes (also known as  
34 remodelers) regulate chromatin architecture by reorganizing nucleosome positioning and content  
35 ([Clapier and Cairns, 2009](#); [Clapier et al., 2017](#)). SWI/SNF is the prototype chromatin remodeler  
36 possessing nucleosome sliding activity and unique histone ejection activity, and by which creates  
37 nucleosome-depleted or nucleosome-free regions (NDRs/NFRs) on gene promoters required for  
38 transcription initiation ([Boeger et al., 2004](#); [Cairns et al., 1994](#); [Cote et al., 1994](#)). SWI/SNF complexes  
39 exist in SWI/SNF and RSC complexes in yeast and their counterparts in mammals are BRG1/BRM-  
40 associated factor (BAF) and polybromo-associated BAF (PBAF) complexes ([Mashtalir et al., 2018](#);  
41 [Wang et al., 1996](#); [Xue et al., 2000](#)), respectively. In line with their functional importance in gene  
42 regulation, BAF and PBAF are among the most frequently mutated complexes in cancer, as up to 20%  
43 of malignancies have alterations on coding genes of BAF/PBAF subunits ([Kadoch and Crabtree, 2015](#);  
44 [Kadoch et al., 2013](#); [Mittal and Roberts, 2020](#); [Wilson and Roberts, 2011](#)).

45 BAF and PBAF are megadalton multi-subunit complexes, which share a catalytic subunit SMARCA4  
46 (BRG1) and eight common auxiliary subunits, including ACTB, ACTL6A, BCL7A, SMARCB1  
47 (BAF47), SMARCD1 (BAF60A), SMARCE1 (BAF57), and two SMARCC1/2 (BAF155 and BAF170,  
48 equivalent and termed SMARCC for simplicity) (Fig. 1a). The two complexes are distinguished by  
49 BAF-specific subunits ARID1A/B (BAF250A/B), DPF1/2/3 (BAF45B/D/C), and SS18 and PBAF-  
50 specific subunits ARID2 (BAF200), PHF10 (BAF45A), PBRM1 (BAF180), and BRD7. Despite recent  
51 advances in structural studies of nucleosome-bound human BAF ([He et al., 2020](#); [Mashtalir et al.,  
52 2020](#)), yeast RSC ([Patel et al., 2019](#); [Wagner et al., 2020](#); [Ye et al., 2019](#)), and yeast SWI/SNF ([Han et  
53 al., 2020](#)) complexes, structure of human PBAF remains unknown. Consistent with the difference in  
54 complex composition, BAF and PBAF exhibit distinct preference in genomic localization ([Alver et al.,  
55 2017](#); [Michel et al., 2018](#)) and functions ([Kadoch and Crabtree, 2015](#); [Mashtalir et al., 2021](#); [Mittal  
56 and Roberts, 2020](#); [Wilson and Roberts, 2011](#)), suggesting a PBAF-nucleosome structure distinct from  
57 that of BAF-nucleosome. SWI/SNF family complexes consist of multiple (over 20 in PBAF) histone-  
58 binding and DNA-binding domains that are believed to facilitate genomic targeting and/or regulate  
59 remodeling activities of these complexes. However, it remains largely unknown how these  
60 histone/DNA-binding domains are organized within apo or nucleosome-bound SWI/SNF complexes.

## 61 **Results**

### 62 **Overall structure of the nucleosome-bound PBAF complex**

63 We overexpressed the 13-subunit human PBAF complex in Expi293F suspension cells through co-  
64 transfection of plasmids containing full-length open reading frames (ORFs) of the catalytic subunit  
65 SMARCA4 and twelve auxiliary subunits (Fig. 1a, Extended Data Fig. 1a). The complex was purified  
66 to homogeneity for biochemical and structural analyses. In vitro chromatin remodeling assay showed  
67 that the purified PBAF converted a center-positioned nucleosome core particle (NCP) to three products,  
68 the end-positioned nucleosome, end-positioned tetrasome, and free DNA, indicative of its activity in  
69 sliding and ejection of nucleosome in a time-dependent manner (Extended Data Fig. 1b).

70 The chromatin substrates in cells of BAF/PBAF commonly contain acetylation at multiple sites of  
71 histone tails, which may regulate chromatin remodeling activity of SWI/SNF family complexes and  
72 facilitate their binding to nucleosome ([Agalioti et al., 2002](#); [Chatterjee et al., 2011](#); [Mashtalir et al.,  
73 2021](#)). We reconstituted unmodified nucleosome and performed an in vitro acetylation reaction using  
74 a mixture of two predominate human histone acetyltransferases (HATs), p300 and SAGA  
75 acetyltransferase subcomplex (Extended Data Fig. 1c). Acetylation of histone H3 at residue K14, a  
76 representative histone acetylation, was validated and the level of acetylation reached a plateau with  
77 increasing concentration of acetyltransferases, indicating nearly complete or highest level of  
78 acetylation in our experimental condition.

79 The purified PBAF was incubated with the acetylated nucleosome (nucleosome or NCP hereafter) in  
80 1:1 stoichiometry in the presence of ATP analogue ADP-BeF<sub>3</sub>, followed by gradient fixation (Grafix)  
81 and cryo-EM sample preparation. Cryo-EM structure of PBAF-NCP was determined to overall  
82 resolution of approximately 4.4 Å (Extended Data Figs. 2, 3, Extended Data Table 1, Supplementary  
83 Videos 1, 2). The PBAF-NCP complex is organized into three modules including the Core, the actin-  
84 related proteins (ARP) ([Cairns et al., 1998](#)), the multi-subunit Base modules. Cryo-EM maps of the  
85 Base and Core modules were improved by focus refinement to near-atomic (3.4 Å to 4.1 Å) resolution  
86 and the ARP to 5.4 Å resolution. Structural models were built according to the cryo-EM maps with  
87 structure of BAF as reference ([He et al., 2020](#)) and aided by cross-linking mass spectrometry (XL-MS)  
88 analysis (Extended Data Fig. 4, Extended Data Table 2).

89 PBAF-NCP structure reveals a tripartite modular organization and is generally similar to the structures  
90 of nucleosome-bound human BAF ([He et al., 2020](#); [Mashtalir et al., 2020](#)) and yeast SWI/SNF and  
91 RSC complexes ([Han et al., 2020](#); [Patel et al., 2019](#); [Wagner et al., 2020](#); [Ye et al., 2019](#)) (Fig. 1b,  
92 Extended Data Fig. 5). SMARCA4 serves as a central scaffold that involves formation of three



93 modules. The Core module is formed by the nucleosome-bound ATPase, a regulatory Hub connecting  
94 ATPase and ARP, and a Snf2 ATP coupling (SnAC) domain ([Sen et al., 2011](#); [Sen et al., 2013](#)) packing  
95 against the surface of histone octamer (Figs. 1 and 2). The ARP module is formed by ACTB-ACTL6A  
96 heterodimer and helicase-SANT-associated (HSA) helix of SMARCA4 that bridges the Core and Base.  
97 Cryo-EM map reveals an additional density within that ARP that was not observed in the 10-subunit  
98 BAF structure ([He et al., 2020](#)), suggesting that this region is derived from PBAF-specific subunit or  
99 BCL7A (not present in the 10-subunit BAF). A two-stranded  $\beta$ -sheet of BCL7A was placed according  
100 to cryo-EM map and XL-MS (Extended Data Figs. 3, 4). The Base module accounts for the majority  
101 of molecular mass and is formed by the preHSA region of SMARCA4 and nine auxiliary subunits  
102 (Figs. 1 and 3).

103 PBAF makes multiple contacts with nucleosome. Within the Core module, the ATPase stably grasps  
104 nucleosomal DNA at superhelical location (SHL) -2 and the interaction is buttressed by two tethers  
105 between ATPase-SnAC and histones (Figs. 1 and 2). Within the Base module, multiple DNA-binding  
106 and histone-binding domains/modules directly bind or are positioned near the nucleosome core particle  
107 (Figs. 1 and 4).

108

### 109 **The ATPase grasps nucleosomal DNA and the Hub couples the ATPase and Base**

110 Structure of the ADP-BeF<sub>3</sub>-bound ATPase at near-atomic resolution shows network of interactions  
111 between the ATPase and ADP-BeF<sub>3</sub>, which results in a close conformation with the ATPase lobe1 and  
112 lobe2 grasping nucleosomal DNA (Fig. 2, Extended Data Fig. 6). As the mimetic  $\gamma$ -phosphate of ATP,  
113 BeF<sub>3</sub> is stabilized by residues R1189 and R1192 of lobe2 and residue K785 within the P-loop of lobe1.  
114 The magnesium cation is coordinated by BeF<sub>3</sub> and residue D881 of lobe1. Structural comparison of  
115 PBAF-NCP with nucleosome-bound ATPase of yeast Snf2 (PDB: 5Z3U) ([Li et al., 2019](#)) shows similar  
116 overall fold of the ATPase in ADP-BeF<sub>3</sub>-bound state, consistent with highly conserved catalytic  
117 mechanism. Compared to the isolated Snf2, the ATPase of PBAF slightly rotates and the Hub helices  
118 are displaced by up to 6 Å, likely resulted from the association of the Base through a regulatory Hub  
119 that connecting the HSA and ATPase.

120 The HSA-containing ARP and postHSA-containing Hub are essential for the function of SWI/SNF  
121 complexes and cancer-associated gain-of-function mutations are enriched on the Hub ([Clapier et al.,](#)  
122 [2016](#); [Clapier et al., 2020](#); [Schubert et al., 2013](#); [Szerlong et al., 2008](#)). However, structural  
123 organization of the Hub was not fully understood. The PBAF-NCP structure shows that the Hub is  
124 formed by five  $\alpha$  helices derived from postHSA, protrusion1/2, and brace1/2 (Fig. 2b, Extended Data

125 Fig. 6). Two protrusion helices associate with ATPase lobe1 on one side and postHSA helix on the  
126 other side. Two brace helices form a helix hairpin, which associates with the two ATPase lobes and  
127 packs against the protrusion helices. Such domain organization suggests that the Hub couples the  
128 motions of ATPase and HSA-associated ARP-Base and therefore regulates chromatin remodeling  
129 activity.

130

### 131 **PBAF-specific modular organization of the Base**

132 The Base of PBAF consists of six BAF/PBAF-shared subunits including SMARCA4, SMARCB1,  
133 SMARCD1, SMARCE1, and two SMARCC, and four PBAF-specific subunits including PBRM1,  
134 BRD7, ARID2 (counterpart of ARID1A/B in BAF), and PHF10 (counterpart of DPF1/2/3 in BAF)  
135 (Figs. 1, 3, Extended Data Fig. 7, Supplementary Videos 1 to 3). The Base module is divided into five  
136 submodules, including the Bridge that nucleates assembly of the Base, the Head that directly binds  
137 histone core particle, the Fingers formed by five-helix bundle and associated domains, the helical  
138 Thumb, and a split Palm. Consistent with the compositional similarity and differences, PBAF and BAF  
139 complexes share generally similar modular organization of the tripartite architecture. However, PBAF  
140 does exhibit PBAF-specific modular organization, distinct from that of BAF mainly at four regions,  
141 termed region-I to region-IV for simplicity.

142

### 143 **ARID2 serves as a scaffold for assembly of the Base**

144 The central Bridge consists of a superhelical armadillo (ARM) repeat derived from the majority of  
145 ordered region in ARID2 ( $ARM^{ARID2}$ ), which covers residues 157-1817 and contains a structurally  
146 flexible insert (residues 480-1752) (Figs. 1, 3, Extended Data Fig. 7). Similar to that of BAF, the  
147  $ARM^{ARID2}$  has seven ARM repeats (ARM1 to ARM7) arranged into a superhelical fold and serves as  
148 a rigid core to nucleate the Base formation through binding preHSA region of SMARCA4 and other  
149 Base subunits.  $ARM^{ARID2}$  and  $ARM^{ARID1A}$  exhibit compositional and conformational difference in  
150 ARM repeats and ARM-associated loops, generating distinct modular organization of PBAF and BAF.

151 Within the Head, the Req helix of PHF10 ( $Req^{PHF10}$ ) packs against a groove of SWIRM<sup>a</sup> (one of the  
152 two SWIRM domains of two SMARCC) and repeat domain 2 (RPT2) of SMARCB1, similar to the  
153 binding pattern of  $Req^{DPF2}$  in BAF-NCP structure ([He et al., 2020](#)), consistent with highly conserved  
154 residues for the interaction (Fig. 3, Extended Data Figs. 8, 9). At the region-I, the N-terminal ARID  
155 domain of ARID2 ( $ARID^{ARID2}$ ) packs against the two RPT domains of SMARCB1 and an extension

156 of Req domain (eReq) of PHF10. Specific incorporation of PHF10, instead of its counterpart DPF1/2/3,  
157 in PBAF may collectively result from the presence of eReq<sup>PHF10</sup>-binding ARID<sup>ARID2</sup> and the lack of an  
158 insert of ARID1A, which stabilizes DPF1/2/3-specific eReq in BAF (Extended Data Figs. 7, 8d, 9).

159

### 160 **PBAF-specific PBRM1 and BRD7**

161 Around the region-II of the Thumb, the C-terminal  $\alpha$  helix of SMARCD1 ( $\alpha$ C<sup>SMARCD1</sup>) is surrounded  
162 by a helix of preHSA of SMARCA4, a SANT domain of one SMARCC (SANT<sup>b</sup>), and three short  $\alpha$   
163 helices (Fig. 3, Extended Data Fig. 7). One of the three helices binds the Bridge on the ARM1<sup>ARID2</sup>  
164 whereas this contact would generate steric clash with an ARM1<sup>ARID1A</sup>-associated loop in BAF. By  
165 contrast, the lack of PBRM1 in BAF leads to direct binding of the Thumb and Bridge and a rotation  
166 of the Thumb to the Head compared to that in PBAF. Cryo-EM map at near-atomic resolution and XL-  
167 MS analysis (Extended Data Figs. 3, 4) together support that this  $\alpha$  helix is derived from the C-terminal  
168 domain of PBAF-specific PBRM1 (CTD<sup>PBRM1</sup>).

169 PBRM1 exclusively exists in PBAF and has no counterpart in BAF. Besides the CTD<sup>PBRM1</sup>, PBRM1  
170 consists of six bromodomains (BD), a bromo-adjacent homology (BAH), and a high mobility group  
171 (HMG) domain that account for the majority of molecular mass but were not structurally observed in  
172 the cryo-EM map. A number of cancer-derived nonsense mutations resulted in truncations of PBRM1  
173 that lack of CTD<sup>PBRM1</sup> ([Varela et al., 2011](#)) (Extended Data Fig. 9b), consistent with the importance of  
174 CTD<sup>PBRM1</sup> in assembly and function of PBAF complex.

175 Around the region-III, the Bridge and Fingers make direct contacts between ARM5-ARM7 and Fingers  
176 helix bundle (Fig. 3, Extended Data Figs. 7, 8). An anchor motif of BRD7 (anchor<sup>BRD7</sup>) inserts into the  
177 gap between the Bridge and Fingers and facilitates their interactions. By contrast, equivalent gap in  
178 BAF is occupied by two ARM<sup>ARID1A</sup>-associated loops coordinated by a zinc finger ([He et al., 2020](#)),  
179 which are absent in ARID2. The C-terminal domain of BRD7 (CTD<sup>BRD7</sup>) binds two N-terminal helices  
180 of SMARCA4 and a SANT domain of the other SMARCC (SANT<sup>a</sup>), generating a split Palm  
181 submodule that associated with the Thumb. The lack of CTD<sup>BRD7</sup> in BAF allows this submodule to  
182 form a full Palm around the Fingers end through binding SMARCC helices and Pillar helices derived  
183 from SMARCD1 and SMARCE1.

184 Unexpectedly, the winged helix domain of SMARCB1 (WH<sup>SMARCB1</sup>) associates with ARM5<sup>ARID1A</sup> of  
185 the Bridge in BAF ([He et al., 2020](#)) but was not observed in equivalent position in PBAF (Fig. 3,  
186 region-IV). By contrast, WH<sup>SMARCB1</sup> in PBAF binds nucleosomal DNA at SHL +6.5 (Fig. 4, described

187 below). Distinct positioning of WH<sup>SMARCB1</sup> may result from the difference in charge distribution of  
188 WH<sup>SMARCB1</sup>-binding surface of ARM<sup>ARID1A</sup> and equivalent region in ARM<sup>ARID2</sup>, which result from  
189 their sequence difference.

190

### 191 **The placements of multiple nucleosome-binding domains/modules**

192 PBAF consists of over 20 nucleosome-binding domains/modules (Fig. 1a) that are thought to be  
193 functionally important in PBAF-mediated chromatin remodeling ([Mashtalir et al., 2021](#)). However,  
194 only a few of these domains/modules were observed in previously reported structures of SWI/SNF  
195 complexes ([Han et al., 2020](#); [He et al., 2020](#); [Mashtalir et al., 2020](#); [Patel et al., 2019](#); [Wagner et al.,](#)  
196 [2020](#); [Ye et al., 2019](#)). Cryo-EM structure of PBAF-NCP reveals the placements of six histone-binding  
197 domains/motifs (Figs. 1, 4, Extended Data Fig. 8), including the H2A-H2B heterodimer-bound  
198 SnAC<sup>SMARCA4</sup> and  $\alpha$ C<sup>SMARCB1</sup>, the H4 tail-bound ATPase lobe2 and Req<sup>PHF10</sup>-SWIRM<sup>SMARCC</sup>  
199 heterodimer, and histone-free BD<sup>BRD7</sup> and YEATS-like domain of SMARCD1 (YEATS<sup>SMARCD1</sup>), and  
200 four DNA-binding domains/modules, including ARID<sup>ARID2</sup> and WH<sup>SMARCB1</sup>, and two unassigned  
201 DNA-interaction modules (DIM1 and DIM2) around exiting DNA of the bound nucleosome.

202

### 203 **The Head and ATPase-SnAC bind nucleosome on two H2A-H2B heterodimers and two H4 tails**

204 Locally refined cryo-EM map of the Core shows that the catalytic subunit SMARCA4 stably engages  
205 with nucleosome (Figs. 2a, 4a). Apart from DNA-ATPase interaction, the acidic patch of ATPase lobe2  
206 binds the N-terminal positively charged tail (K<sup>16</sup>RHRK<sup>20</sup>) of histone H4 (Fig. 4a, position-1) and the  
207 SnAC domain extends out of the ATPase domain and winds over the acidic patch of H2A-H2B  
208 heterodimer (Fig. 4a, position-2). The SnAC extends to the nucleosomal DNA at SHL -6. The two  
209 nucleosome-SMARCA4 tethers may facilitate nucleosome-association of the ATPase during DNA  
210 translocation, consistent with the known functions of SnAC domain ([Sen et al., 2011](#); [Sen et al., 2013](#))  
211 and K16/20 acetylation of histone H4 ([Mashtalir et al., 2021](#)) in regulating activities of SWI/SNF  
212 complexes.

213 The positively charged helix  $\alpha$ C<sup>SMARCB1</sup> binds the acidic patch of the bottom H2A-H2B heterodimer  
214 and binding pattern is similar to that observed in BAF-NCP structure ([He et al., 2020](#)) (Fig. 4, position-  
215 3). In PBAF and BAF complexes, the Core and Base are similarly connected by the H2A-H2B  
216 heterodimer- $\alpha$ C<sup>SMARCB1</sup> and the Hub-HSA-ARP tethers (Extended Data Fig. 7). Some cancer-  
217 associated mutations are enriched on  $\alpha$ C<sup>SMARCB1</sup> (loss of function) ([Valencia et al., 2019](#)) and the Hub

218 (gain of function) ([Clapier et al., 2020](#)), supporting their functional importance in both BAF and PBAF  
219 complexes.

220 Due to the differences in composition and arrangement of nucleosome-binding domains, PBAF and  
221 BAF exhibit distinct intermodular organization of the Core and Base (Fig. 4, Extended Data Fig. 7,  
222 Supplementary Video 3). For example, compared to that of BAF, the Head of PBAF rotates toward  
223 nucleosomal DNA at +2, permitting the binding of the N-terminal tail of histone H4 to Req<sup>PHF10</sup>-  
224 SWIRM<sup>SMARCC</sup> heterodimer (Fig. 4a, position-4, Extended Data Fig. 8b). The interaction is likely  
225 mediated by positively charged residues of H4 tail and a negatively charged patch of Req<sup>PHF10</sup>-  
226 SWIRM<sup>SMARCC</sup> heterodimer.

227

### 228 **Positions of two putative histone-binding domains**

229 We observed relatively weak cryo-EM map positioned near CTD<sup>PBRM1</sup> within the Thumb (Fig. 4,  
230 position-5, Extended Data Fig. 2). XL-MS analysis suggests that it is derived from the bromodomain  
231 of BRD7 (BD<sup>BRD7</sup>) (Extended Data Fig. 4, Extended Data Table 2). Predicted structural model of  
232 BD<sup>BRD7</sup> was placed into the map and the putative histone binding site is about 70 and 50 Å away from  
233 the histone fold regions of H3 and H4, respectively (Extended Data Fig. 8). Thus, BD<sup>BRD7</sup> is accessible  
234 to acetylated histone tails, ~30-40 residues in length, in line with its predicted function in binding of  
235 histone acetylation.

236 Within the Bridge, the SWIB domain of SMARCD1 is organized by four short helices and serves as a  
237 helical extension of the ARM repeat (Fig. 4, position-6, Extended Data Fig. 8a). The YEATS-like  
238 domain of SMARCD1 (YEATS<sup>SMARCD1</sup>) associates with SWIB<sup>SMARCD1</sup> and the coiled-coil of  
239 SMARCD1 in the Fingers. YEATS<sup>SMARCD1</sup> is organized into two parallel four-stranded β-sheets, as in  
240 other YEATS domains, but lacks a conserved acetyl-lysine binding pocket. As a peripheral domain,  
241 YEATS<sup>SMARCD1</sup> is positioned by as far as 120 Å away from nucleosome core particle, suggesting its  
242 role independent of binding nucleosome. Nevertheless, the YEATS-like domain is strictly conserved  
243 among the snf12/Rsc6/SMARCD1 family proteins, which regulates expression of genes in stress  
244 response ([Cairns et al., 1996](#); [He et al., 2021](#)).

245

### 246 **DNA-binding domains around the exiting DNA**

247 Apart from the ATPase, additional DNA-binding domains were observed around the exiting DNA (Fig.

248 4, position-7). ARID domains of ARID1A/1B and ARID2 are predicted to bind DNA ([Patsialou et al.,](#)  
249 [2005](#)) but not structurally observed in previous studies of SWI/SNF complexes. ARID<sup>ARID2</sup> in the Head  
250 submodule has no direct contact with nucleosomal DNA but its positively charged surface faces toward  
251 DNA, leaving the possibility to make a direct DNA-binding if underwent conformational change.

252 Cryo-EM map of PBAF-NCP shows noticeable density associated with nucleosomal DNA at SHL  
253 +6.5 and structural model of WH<sup>SMARCB1</sup> fits this density well (Fig. 4, position-8, Extended Data Fig.  
254 8c). The placement of WH<sup>SMARCB1</sup> suggests that the positively charged helix insets into the major  
255 groove of DNA with a cluster of characteristic basic residues (R37/R40/K45/R46/R52/R53) positioned  
256 near phosphate groups for charge-charge interactions, exhibiting a DNA-binding pattern similar to  
257 previously proposed model ([Allen et al., 2015](#)).

258 Cryo-EM map reveals an unassigned density of DIM1 connecting ARM helices of the Bridge and  
259 extranucleosomal DNA at 10-bp to 20-bp downstream of the exit site at SHL +7, suggesting that DIM1  
260 is possibly derived from the RFX-like DNA binding domain (RFX) and/or zinc finger (ZnF) of ARID2  
261 (Fig. 4b, position-9, Extended Data Fig. 8e). Another unassigned region (DIM2) associates with the  
262 BD<sup>BRD7</sup> and makes contacts with extranucleosomal DNA (Fig. 4b, position-10, Extended Data Fig. 8e).  
263 This region is possibly derived from DNA-binding domains of nearby subunits, such as WH domain  
264 of PHF10, HMG domain of PBRM1, and C2H2 zinc finger of ARID2.

265 PBAF-DNA contacts are enriched around the exiting site of nucleosomal DNA, a characteristic feature  
266 distinct from that of BAF-NCP structure, in which neither equivalent DNA contact nor placement of  
267 DNA-binding domains was observed ([He et al., 2020](#)). Cryo-EM map of nucleosome-bound RSC  
268 (yeast counterpart of PBAF) at low resolution showed that an unassigned DIM binds extranucleosomal  
269 DNA 20-bp to 40-bp downstream of SHL +7 of nucleosome ([Wagner et al., 2020](#)) (Extended Data Fig.  
270 8f). While DNA-binding pattern differs in PBAF and RSC, binding of exiting DNA may represent an  
271 evolutionarily conserved function in targeting PBAF/RSC to promoters ([Badis et al., 2008](#); [Kubik et](#)  
272 [al., 2015](#); [Kubik et al., 2018](#); [Lorch et al., 2014](#)).

273 Apart from the observed histone-binding and DNA-binding domains/modules, PBAF also consists of  
274 domains/modules that are invisible in the cryo-EM map, including two bromodomains of SMARCA4,  
275 WH domain and two PHD domains of PHF10, and HMG and six bromodomains of PBRM1, which  
276 are tethered with the Core module, the Head and Thumb submodules, respectively, consistent with  
277 their predicted roles in binding DNA and modified histone tails and targeting chromatin for function  
278 (Fig. 4).

279



## 280 Discussion

281 PBAF and BAF share identical subunits and equivalent subunits, and therefore are commonly  
282 considered highly similar in structure and function. PBAF differs from BAF in its presence of multiple  
283 acetylation-binding bromodomains. However, our study unexpectedly shows marked structural  
284 difference in their modular organization of the Base and placements of DNA/histone-binding domains.  
285 PBAF-specific subunits, ARID2, PBRM1, PHF10, and BRD7 not only provide PBAF-specific  
286 nucleosome-binding domains but also alter the placements of some nucleosome-binding domains of  
287 the PBAF/BAF-shared subunits, such as WH<sup>SMARCB1</sup> and Req<sup>PHF10</sup>-SWIRM<sup>SMARCC</sup>. Consistent with  
288 their functional requirement, the majority of nucleosome-binding domains exist or associate with the  
289 Head and Thumb submodules, which are positioned near the nucleosome. Such multivalent  
290 nucleosome-binding pattern was not observed in previous studies. The PBAF-NCP structure may  
291 provide a framework to further investigate whether, and if yes, how these nucleosome-binding domains  
292 work coordinately or redundantly in integrating chromatin marks for remodeling chromatin targets.

293 Cancer-derived mutations are also frequently observed in PBAF-specific subunits ([Hakimi et al., 2020](#);  
294 [Varela et al., 2011](#)) (Extended Data Fig. 9b). Missense mutations predominately occur on domains that  
295 are involved in complex assembly (binding of other subunits) or histone/DNA-binding domains, in  
296 line with the critical roles of these domains in PBAF function. Large number of nonsense mutations  
297 occur throughout PBRM1 and ARID2, consistent with the importance of CTD<sup>PBRM1</sup> and ARM7<sup>ARID2</sup>  
298 in organizing the Base module.

299 During preparation of this manuscript, a structure of human PBAF-NCP was published ([Yuan et al.,](#)  
300 [2022](#)). The complex was assembled with unmodified nucleosome and 12-subunit PBAF (lack of  
301 BCL7A). To improve complex behavior in structure determination, Yuan et al. removed the N-terminal  
302 region of SMARCA4 (residues 1-159), the first four bromodomains of PBRM1 (residues 1-630), and  
303 the internal region of ARID2 (residues 627-1591). Cryo-EM map at high resolution indeed favor the  
304 assignment of Base subunits, including CTD<sup>PBRM1</sup> and BD<sup>BRD7</sup>. By contrast, we assembled the  
305 complex using acetylated nucleosome and human PBAF containing 13 full-length subunits. The  
306 generated cryo-EM map revealed subunits BCL7A and YEATS<sup>SMARCD1</sup> domain and additional PBAF-  
307 NCP contacts including DNA-WH<sup>SMARCB1</sup>, DNA-DIM1, DNA-DIM2, and histone H4 tail-Req<sup>PHF10</sup>-  
308 SWIRM<sup>SMARCC</sup>. Thus, our study provides complementary structural insights into multivalent  
309 interactions between PBAF and nucleosome and a framework for understanding PBAF functions in  
310 chromatin targeting and remodeling.

311 **Reference:**

- 312 Adams, P.D., Grosse-Kunstleve, R.W., Hung, L.W., Ioerger, T.R., McCoy, A.J., Moriarty, N.W., Read,  
313 R.J., Sacchettini, J.C., Sauter, N.K., and Terwilliger, T.C. (2002). PHENIX: building new software for  
314 automated crystallographic structure determination. *Acta Crystallogr D Biol Crystallogr* 58, 1948-  
315 1954.
- 316 Agalioti, T., Chen, G., and Thanos, D. (2002). Deciphering the transcriptional histone acetylation code  
317 for a human gene. *Cell* 111, 381-392.
- 318 Allen, M.D., Freund, S.M., Zinzalla, G., and Bycroft, M. (2015). The SWI/SNF Subunit INI1 Contains  
319 an N-Terminal Winged Helix DNA Binding Domain that Is a Target for Mutations in Schwannomatosis.  
320 *Structure* 23, 1344-1349.
- 321 Alver, B.H., Kim, K.H., Lu, P., Wang, X., Manchester, H.E., Wang, W., Haswell, J.R., Park, P.J., and  
322 Roberts, C.W. (2017). The SWI/SNF chromatin remodelling complex is required for maintenance of  
323 lineage specific enhancers. *Nat Commun* 8, 14648.
- 324 Badis, G., Chan, E.T., van Bakel, H., Pena-Castillo, L., Tillo, D., Tsui, K., Carlson, C.D., Gossett, A.J.,  
325 Hasinoff, M.J., Warren, C.L., *et al.* (2008). A library of yeast transcription factor motifs reveals a  
326 widespread function for Rsc3 in targeting nucleosome exclusion at promoters. *Mol Cell* 32, 878-887.
- 327 Boeger, H., Griesenbeck, J., Strattan, J.S., and Kornberg, R.D. (2004). Removal of promoter  
328 nucleosomes by disassembly rather than sliding in vivo. *Mol Cell* 14, 667-673.
- 329 Cairns, B.R., Erdjument-Bromage, H., Tempst, P., Winston, F., and Kornberg, R.D. (1998). Two actin-  
330 related proteins are shared functional components of the chromatin-remodeling complexes RSC and  
331 SWI/SNF. *Mol Cell* 2, 639-651.
- 332 Cairns, B.R., Kim, Y.J., Sayre, M.H., Laurent, B.C., and Kornberg, R.D. (1994). A multisubunit  
333 complex containing the SWI1/ADR6, SWI2/SNF2, SWI3, SNF5, and SNF6 gene products isolated  
334 from yeast. *Proc Natl Acad Sci U S A* 91, 1950-1954.
- 335 Cairns, B.R., Levinson, R.S., Yamamoto, K.R., and Kornberg, R.D. (1996). Essential role of Swp73p  
336 in the function of yeast Swi/Snf complex. *Genes Dev* 10, 2131-2144.
- 337 Chatterjee, N., Sinha, D., Lemma-Dechassa, M., Tan, S., Shogren-Knaak, M.A., and Bartholomew, B.  
338 (2011). Histone H3 tail acetylation modulates ATP-dependent remodeling through multiple  
339 mechanisms. *Nucleic Acids Res* 39, 8378-8391.
- 340 Chen, X., Yin, X., Li, J., Wu, Z., Qi, Y., Wang, X., Liu, W., and Xu, Y. (2021). Structures of the human  
341 Mediator and Mediator-bound preinitiation complex. *Science* 372.
- 342 Chen, Z.L., Meng, J.M., Cao, Y., Yin, J.L., Fang, R.Q., Fan, S.B., Liu, C., Zeng, W.F., Ding, Y.H., Tan,  
343 D., *et al.* (2019). A high-speed search engine pLink 2 with systematic evaluation for proteome-scale  
344 identification of cross-linked peptides. *Nat Commun* 10, 3404.
- 345 Clapier, C.R., and Cairns, B.R. (2009). The biology of chromatin remodeling complexes. *Annu Rev*  
346 *Biochem* 78, 273-304.
- 347 Clapier, C.R., Iwasa, J., Cairns, B.R., and Peterson, C.L. (2017). Mechanisms of action and regulation  
348 of ATP-dependent chromatin-remodelling complexes. *Nat Rev Mol Cell Biol* 18, 407-422.
- 349 Clapier, C.R., Kasten, M.M., Parnell, T.J., Viswanathan, R., Szerlong, H., Sirinakis, G., Zhang, Y., and  
350 Cairns, B.R. (2016). Regulation of DNA Translocation Efficiency within the Chromatin Remodeler  
351 RSC/Sth1 Potentiates Nucleosome Sliding and Ejection. *Mol Cell* 62, 453-461.
- 352 Clapier, C.R., Verma, N., Parnell, T.J., and Cairns, B.R. (2020). Cancer-Associated Gain-of-Function



- 353 Mutations Activate a SWI/SNF-Family Regulatory Hub. *Mol Cell* *80*, 712-725 e715.
- 354 Combe, C.W., Fischer, L., and Rappsilber, J. (2015). xiNET: cross-link network maps with residue  
355 resolution. *Mol Cell Proteomics* *14*, 1137-1147.
- 356 Cote, J., Quinn, J., Workman, J.L., and Peterson, C.L. (1994). Stimulation of GAL4 derivative binding  
357 to nucleosomal DNA by the yeast SWI/SNF complex. *Science* *265*, 53-60.
- 358 Croll, T.I. (2018). ISOLDE: a physically realistic environment for model building into low-resolution  
359 electron-density maps. *Acta Crystallogr D Struct Biol* *74*, 519-530.
- 360 Emsley, P., and Cowtan, K. (2004). Coot: model-building tools for molecular graphics. *Acta*  
361 *Crystallogr D Biol Crystallogr* *60*, 2126-2132.
- 362 Eustermann, S., Schall, K., Kostrewa, D., Lakomek, K., Strauss, M., Moldt, M., and Hopfner, K.P.  
363 (2018). Structural basis for ATP-dependent chromatin remodelling by the INO80 complex. *Nature* *556*,  
364 386-390.
- 365 Hakimi, A.A., Attalla, K., DiNatale, R.G., Ostrovskaya, I., Flynn, J., Blum, K.A., Ged, Y., Hoen, D.,  
366 Kendall, S.M., Reznik, E., *et al.* (2020). A pan-cancer analysis of PBAF complex mutations and their  
367 association with immunotherapy response. *Nat Commun* *11*, 4168.
- 368 Han, Y., Reyes, A.A., Malik, S., and He, Y. (2020). Cryo-EM structure of SWI/SNF complex bound to  
369 a nucleosome. *Nature* *579*, 452-455.
- 370 He, S., Wu, Z., Tian, Y., Yu, Z., Yu, J., Wang, X., Li, J., Liu, B., and Xu, Y. (2020). Structure of  
371 nucleosome-bound human BAF complex. *Science* *367*, 875-881.
- 372 He, Z., Chen, K., Ye, Y., and Chen, Z. (2021). Structure of the SWI/SNF complex bound to the  
373 nucleosome and insights into the functional modularity. *Cell Discov* *7*, 28.
- 374 Kadoch, C., and Crabtree, G.R. (2015). Mammalian SWI/SNF chromatin remodeling complexes and  
375 cancer: Mechanistic insights gained from human genomics. *Sci Adv* *1*, e1500447.
- 376 Kadoch, C., Hargreaves, D.C., Hodges, C., Elias, L., Ho, L., Ranish, J., and Crabtree, G.R. (2013).  
377 Proteomic and bioinformatic analysis of mammalian SWI/SNF complexes identifies extensive roles  
378 in human malignancy. *Nat Genet* *45*, 592-601.
- 379 Kastner, B., Fischer, N., Golas, M.M., Sander, B., Dube, P., Boehringer, D., Hartmuth, K., Deckert, J.,  
380 Hauer, F., Wolf, E., *et al.* (2008). GraFix: sample preparation for single-particle electron  
381 cryomicroscopy. *Nat Methods* *5*, 53-55.
- 382 Kimanius, D., Forsberg, B.O., Scheres, S.H., and Lindahl, E. (2016). Accelerated cryo-EM structure  
383 determination with parallelisation using GPUs in RELION-2. *Elife* *5*.
- 384 Klinker, H., Haas, C., Harrer, N., Becker, P.B., and Mueller-Planitz, F. (2014). Rapid purification of  
385 recombinant histones. *PLoS One* *9*, e104029.
- 386 Kubik, S., Bruzzone, M.J., Jacquet, P., Falcone, J.L., Rougemont, J., and Shore, D. (2015).  
387 Nucleosome Stability Distinguishes Two Different Promoter Types at All Protein-Coding Genes in  
388 Yeast. *Mol Cell* *60*, 422-434.
- 389 Kubik, S., O'Duibhir, E., de Jonge, W.J., Mattarocci, S., Albert, B., Falcone, J.L., Bruzzone, M.J.,  
390 Holstege, F.C.P., and Shore, D. (2018). Sequence-Directed Action of RSC Remodeler and General  
391 Regulatory Factors Modulates +1 Nucleosome Position to Facilitate Transcription. *Mol Cell* *71*, 89-  
392 102 e105.
- 393 Li, M., Xia, X., Tian, Y., Jia, Q., Liu, X., Lu, Y., Li, M., Li, X., and Chen, Z. (2019). Mechanism of  
394 DNA translocation underlying chromatin remodelling by Snf2. *Nature* *567*, 409-413.

- 395 Lorch, Y., Maier-Davis, B., and Kornberg, R.D. (2014). Role of DNA sequence in chromatin  
396 remodeling and the formation of nucleosome-free regions. *Genes Dev* 28, 2492-2497.
- 397 Lowary, P.T., and Widom, J. (1998). New DNA sequence rules for high affinity binding to histone  
398 octamer and sequence-directed nucleosome positioning. *J Mol Biol* 276, 19-42.
- 399 Luger, K., Rechsteiner, T.J., and Richmond, T.J. (1999). Expression and purification of recombinant  
400 histones and nucleosome reconstitution. *Methods Mol Biol* 119, 1-16.
- 401 Mashtalir, N., D'Avino, A.R., Michel, B.C., Luo, J., Pan, J., Otto, J.E., Zullo, H.J., McKenzie, Z.M.,  
402 Kubiak, R.L., St Pierre, R., *et al.* (2018). Modular Organization and Assembly of SWI/SNF Family  
403 Chromatin Remodeling Complexes. *Cell* 175, 1272-1288 e1220.
- 404 Mashtalir, N., Dao, H.T., Sankar, A., Liu, H., Corin, A.J., Bagert, J.D., Ge, E.J., D'Avino, A.R.,  
405 Filipovski, M., Michel, B.C., *et al.* (2021). Chromatin landscape signals differentially dictate the  
406 activities of mSWI/SNF family complexes. *Science* 373, 306-315.
- 407 Mashtalir, N., Suzuki, H., Farrell, D.P., Sankar, A., Luo, J., Filipovski, M., D'Avino, A.R., St Pierre,  
408 R., Valencia, A.M., Onikubo, T., *et al.* (2020). A Structural Model of the Endogenous Human BAF  
409 Complex Informs Disease Mechanisms. *Cell* 183, 802-817 e824.
- 410 Maskell, D.P., Renault, L., Serrao, E., Lesbats, P., Matadeen, R., Hare, S., Lindemann, D., Engelman,  
411 A.N., Costa, A., and Cherepanov, P. (2015). Structural basis for retroviral integration into nucleosomes.  
412 *Nature* 523, 366-369.
- 413 Michel, B.C., D'Avino, A.R., Cassel, S.H., Mashtalir, N., McKenzie, Z.M., McBride, M.J., Valencia,  
414 A.M., Zhou, Q., Bocker, M., Soares, L.M.M., *et al.* (2018). A non-canonical SWI/SNF complex is a  
415 synthetic lethal target in cancers driven by BAF complex perturbation. *Nat Cell Biol* 20, 1410-1420.
- 416 Mittal, P., and Roberts, C.W.M. (2020). The SWI/SNF complex in cancer - biology, biomarkers and  
417 therapy. *Nat Rev Clin Oncol* 17, 435-448.
- 418 Patel, A.B., Moore, C.M., Greber, B.J., Luo, J., Zukin, S.A., Ranish, J., and Nogales, E. (2019).  
419 Architecture of the chromatin remodeler RSC and insights into its nucleosome engagement. *eLife* 8.
- 420 Patsialou, A., Wilsker, D., and Moran, E. (2005). DNA-binding properties of ARID family proteins.  
421 *Nucleic Acids Res* 33, 66-80.
- 422 Pettersen, E.F., Goddard, T.D., Huang, C.C., Couch, G.S., Greenblatt, D.M., Meng, E.C., and Ferrin,  
423 T.E. (2004). UCSF Chimera--a visualization system for exploratory research and analysis. *J Comput*  
424 *Chem* 25, 1605-1612.
- 425 Punjani, A., Rubinstein, J.L., Fleet, D.J., and Brubaker, M.A. (2017). cryoSPARC: algorithms for rapid  
426 unsupervised cryo-EM structure determination. *Nat Methods* 14, 290-296.
- 427 Scheres, S.H. (2012). RELION: implementation of a Bayesian approach to cryo-EM structure  
428 determination. *J Struct Biol* 180, 519-530.
- 429 Schubert, H.L., Wittmeyer, J., Kasten, M.M., Hinata, K., Rawling, D.C., Heroux, A., Cairns, B.R., and  
430 Hill, C.P. (2013). Structure of an actin-related subcomplex of the SWI/SNF chromatin remodeler. *Proc*  
431 *Natl Acad Sci U S A* 110, 3345-3350.
- 432 Sen, P., Ghosh, S., Pugh, B.F., and Bartholomew, B. (2011). A new, highly conserved domain in  
433 Swi2/Snf2 is required for SWI/SNF remodeling. *Nucleic Acids Res* 39, 9155-9166.
- 434 Sen, P., Vivas, P., Dechassa, M.L., Mooney, A.M., Poirier, M.G., and Bartholomew, B. (2013). The  
435 SnAC domain of SWI/SNF is a histone anchor required for remodeling. *Mol Cell Biol* 33, 360-370.
- 436 Szerlong, H., Hinata, K., Viswanathan, R., Erdjument-Bromage, H., Tempst, P., and Cairns, B.R.

437 (2008). The HSA domain binds nuclear actin-related proteins to regulate chromatin-remodeling  
438 ATPases. *Nat Struct Mol Biol* *15*, 469-476.

439 Valencia, A.M., Collings, C.K., Dao, H.T., St Pierre, R., Cheng, Y.C., Huang, J., Sun, Z.Y., Seo, H.S.,  
440 Mashtalir, N., Comstock, D.E., *et al.* (2019). Recurrent SMARCB1 Mutations Reveal a Nucleosome  
441 Acidic Patch Interaction Site That Potentiates mSWI/SNF Complex Chromatin Remodeling. *Cell* *179*,  
442 1342-1356 e1323.

443 Varela, I., Tarpey, P., Raine, K., Huang, D., Ong, C.K., Stephens, P., Davies, H., Jones, D., Lin, M.L.,  
444 Teague, J., *et al.* (2011). Exome sequencing identifies frequent mutation of the SWI/SNF complex  
445 gene PBRM1 in renal carcinoma. *Nature* *469*, 539-542.

446 Wagner, F.R., Dienemann, C., Wang, H., Stutzer, A., Tegunov, D., Urlaub, H., and Cramer, P. (2020).  
447 Structure of SWI/SNF chromatin remodeller RSC bound to a nucleosome. *Nature* *579*, 448-451.

448 Wang, W., Cote, J., Xue, Y., Zhou, S., Khavari, P.A., Biggar, S.R., Muchardt, C., Kalpana, G.V., Goff,  
449 S.P., Yaniv, M., *et al.* (1996). Purification and biochemical heterogeneity of the mammalian SWI-SNF  
450 complex. *EMBO J* *15*, 5370-5382.

451 Wilson, B.G., and Roberts, C.W. (2011). SWI/SNF nucleosome remodellers and cancer. *Nat Rev*  
452 *Cancer* *11*, 481-492.

453 Xue, Y., Canman, J.C., Lee, C.S., Nie, Z., Yang, D., Moreno, G.T., Young, M.K., Salmon, E.D., and  
454 Wang, W. (2000). The human SWI/SNF-B chromatin-remodeling complex is related to yeast rsc and  
455 localizes at kinetochores of mitotic chromosomes. *Proc Natl Acad Sci U S A* *97*, 13015-13020.

456 Ye, Y., Wu, H., Chen, K., Clapier, C.R., Verma, N., Zhang, W., Deng, H., Cairns, B.R., Gao, N., and  
457 Chen, Z. (2019). Structure of the RSC complex bound to the nucleosome. *Science* *366*, 838-843.

458 Yuan, J., Chen, K., Zhang, W., and Chen, Z. (2022). Structure of human chromatin-remodelling PBAF  
459 complex bound to a nucleosome. *Nature*.

460 Zhang, K. (2016). Gctf: Real-time CTF determination and correction. *J Struct Biol* *193*, 1-12.

461 Zheng, S.Q., Palovcak, E., Armache, J.P., Verba, K.A., Cheng, Y., and Agard, D.A. (2017).  
462 MotionCor2: anisotropic correction of beam-induced motion for improved cryo-electron microscopy.  
463 *Nat Methods* *14*, 331-332.

464

465 **Acknowledgments:** We thank the Center of Cryo-Electron Microscopy of Fudan University for the  
466 supports on data collection and the Biomedical Core Facility, Fudan University for the support on mass  
467 spectrometry analyses. This work was supported by grants from the National key R&D program of  
468 China (2016YFA0500700), the National Natural Science Foundation of China (32030055, 31830107,  
469 31821002, 31970146), the National Postdoctoral Program for Innovative Talent (S. H.), the Shanghai  
470 Municipal Science and Technology Major Project (2017SHZDZX01), Shanghai Municipal Science  
471 and Technology Commission (19JC1411500), the National Ten-Thousand Talent Program (Y. X.), the  
472 National Program for support of Top-Notch Young Professionals (Y. X.), and the XPLOER Prize (Y.  
473 X).

474 **Author contributions:** L. W. prepared the samples for structural and biochemical analyses with help  
475 from J. Y. and S. H.; Z. Y. performed EM analyses and model building with help from Q. W. and Z. C.;  
476 Y. X., L. W. and S. H. wrote the manuscript; Y. X. supervised the project.

477 **Competing interests:** Authors declare no competing interests.

478 **Data and materials availability:** Cryo-EM maps and atomic coordinates will be deposited in the  
479 EMDB and PDB upon the acceptance of this manuscript.

## 480 **Methods**

### 481 **PBAF expression and purification**

482 The thirteen full-length open reading frames (ORFs) of PBAF subunits were subcloned into modified  
483 pMLink vector containing no tag or the N-terminal Flag tag and 4 x Protein A tag followed by an HRV-  
484 3C cleavage site. All human PBAF subunits were co-transfected into suspension Expi293F cells using  
485 polyethylenimine (Polysciences). Cells were cultured for 72 h at 37°C and harvested by centrifugation.  
486 For complex purification, all the steps were performed at 4°C. Cells were disrupted in lysis buffer  
487 containing 50 mM HEPES pH 8.0, 300 mM NaCl, 5% (v/v) Glycerol, 0.2% (w/v) chaps, 2 mM MgCl<sub>2</sub>,  
488 0.5 mM EDTA (Ethylenediaminetetraacetic Acid), 2 mM DTT (Dithiothreitol), 1 mM PMSF  
489 (Phenylmethylsulfonyl fluoride), 1 µg/mL Aprotinin, 1 µg/mL Pepstatin, 1 µg/mL Leupeptin for 30  
490 min. Cell lysate was clarified by centrifugation at 16000 rpm for 30 min. The supernatant was  
491 incubated with IgG resin for 4 h and washed thoroughly with wash buffer containing 20 mM HEPES  
492 pH 8.0, 150 mM KCl, 5% (v/v) Glycerol, 0.1% chaps, 2 mM MgCl<sub>2</sub>, 2 mM DTT. After on-column  
493 digestion overnight, immobilized protein was eluted using wash buffer and further loaded onto an ion-  
494 exchange column (MonoQ 5/50 GL column, GE Healthcare) to achieve highly pure PBAF complex.  
495 The peak fractions corresponding to PBAF complex were collected and concentrated to ~3 mg/mL.  
496 The concentrated samples were used for subsequent biochemical and structural analyses.

497

### 498 **Preparation of nucleosomes**

499 Canonical human histone H2A-H2B heterodimer and H3.1-H4 heterotetramer were separately co-  
500 expressed as soluble protein in Escherichia coli BL21 (DE3) cells as described previously ([Klinker et](#)  
501 [al., 2014](#)). In brief, cells were disrupted in lysis buffer containing 50 mM Tris-HCl (pH 8.0), 2 M NaCl,  
502 5% (v/v) glycerol, 0.7 mM β-mercaptoethanol (β-ME), and then purified through ion-exchange  
503 chromatography. For histone octamer assembly, H2A-H2B heterodimer in 1.2-fold excess was mixed  
504 with H3.1-H4 heterotetramer and then incubated for 0.5 h at 4°C, followed by a size exclusion  
505 chromatography (Superdex 200 10/300, GE Healthcare). Peak fractions were concentrated and used  
506 for nucleosome assembly.

507 DNA fragments for mononucleosome reconstitution were prepared by PCR amplification ([Maskell et](#)  
508 [al., 2015](#)). Three different mononucleosome DNA used in this study contained the Widom 601  
509 positioning sequence ([Lowary and Widom, 1998](#)). Nucleosome 45N45 (N denotes nucleosome)  
510 consists of two flanking sequences of 45-bp in length. Nucleosome 0N90 consists of one flanking

511 DNA with 90-bp in length. Nucleosome 15N51 consists of a 15-bp and a 51-bp flanking DNAs.

512 A center-positioned nucleosome 45N45 was assembled and used as a substrate in nucleosome  
513 remodeling activity. The DNA sequence of 45N45 is as below:

514 GCATCCCTTATGTGAGGTACCCTATACGCGGCCGCCCGGATCCCCTGGAGAATCCCGGT  
515 GCCGAGGCCGCTCAATTGGTTCGTAGACAGCTCTAGCACCGCTTAAACGCACGTACGCGCT  
516 GTCCCCCGCGTTTTAACCGCCAAGGGGATTACTCCCTAGTCTCCAGGCACGTGTCACATAT  
517 ATACATCCTGTTCCAGTGCCGGGCATGTATTGAACAGCGTTTTAAACCGGTGCCAGT(the  
518 ‘601’ positioning sequence is underscored).

519 An end-positioned nucleosome 0N90 was assembled and used as the reference in nucleosome  
520 remodeling activity. The DNA sequence of 0N90 is as below:

521 CTGGAGAATCCCGGTGCCGAGGCCGCTCAATTGGTTCGTAGACAGCTCTAGCACCGCTTAA  
522 ACGCACGTACGCGCTGTCCCCCGCGTTTTAACCGCCAAGGGGATTACTCCCTAGTCTCCA  
523 GGCACGTGTCACATATATACATCCTGTTCCAGTGCCGGTGTCGCTTGGGTCCCGAGGTATT  
524 CAAGCTTATCGATACCTGCGACCACGAGGGGGGGTGCCGGGCATGTATTGAACAGC(the  
525 ‘601’ positioning sequence is underscored).

526 The nucleosome 15N51 was assembled and used for cryo-EM. The DNA sequence of 15N51 is as  
527 below:

528 ATCCTGGGGAATTCCCTGGAGAATCCCGGTGCCGAGGCCGCTCAATTGGTTCGTAGACAGC  
529 TCTAGCACCGCTTAAACGCACGTACGCGCTGTCCCCCGCGTTTTAACCGCCAAGGGGATT  
530 ACTCCCTAGTCTCCAGGCACGTGTCACATATATACATCCTGTTCCAGTGCCGGTGTCGCTT  
531 GGGTCCCGAGGATTACAAGCTTATCGATAGAT(the ‘601’ positioning sequence is underscored).

532 The 15N51 DNA fragment was inserted into the pUC57 vector, and the plasmid DNA was amplified  
533 in the *E. coli* strain DH5 $\alpha$ . The 15N51 DNA fragment was excised from the plasmid DNA by EcoR V.  
534 The 45N45 and 0N90 DNA fragments were prepared using PCR amplification. All the nucleosomal  
535 DNA fragments were purified using ion-exchange chromatography (Source Q 5/5, GE Healthcare) and  
536 isopropanol precipitation. The purified DNA pellet was dissolved in 1 x TE buffer.

537 Nucleosome reconstitution was performed by mixing DNA with octamer at a equimolar ratio, with a  
538 linear salt gradient dialysis according to previously published research ([Luger et al., 1999](#)). Finally,  
539 nucleosomes were dialyzed to 1 x HE buffer (10 mM HEPES pH 8.0, 0.1 mM EDTA). The  
540 nucleosomes can be immediately used for complex assembly and biochemical assay.



541

## 542 **In vitro chromatin remodeling assay**

543 In vitro chromatin remodeling assay was performed using purified PBAF complex and nucleosome  
544 45N45 as substrate. Nucleosome 45N45 (120 nM) was mixed with PBAF (80 nM) in buffer containing  
545 20 mM Tris-HCl (pH 8.0), 60 mM KCl, 5 mM MgCl<sub>2</sub>, 0.1 mg/mL BSA, 5% (v/v) glycerol. The  
546 reactions were started with the addition of 1 mM ATP at 30°C and stopped at different time points (0,  
547 0.25, 0.5, 3, 5, 10, 30 min) by adding competitor plasmid (~1 ug) in excess, followed by further  
548 incubation for 30 min on ice. The reaction samples were analyzed by 5% native PAGE gel at 4°C and  
549 run in 0.5 x Tris-Glycine buffer for 50 min at 180V constant. The PAGE gels were stained with GelRed  
550 dye and visualized using the Tanon-2500 image system. Ejection of H2A-H2B heterodimer as  
551 validated by western blotting using antibody against histone H2B.

552

## 553 **Nucleosome acetylation**

554 To generate acetylated nucleosome, we purified two histone acetyltransferases (HATs), p300 and  
555 SAGA acetyltransferase subcomplex containing KAT2A, STAF36, TADA2B, and TADA3L. The  
556 expression and purification procedures are essentially similar to that of PBAF. Nucleosome 15N51  
557 was acetylated in reaction buffer containing 50 mM Tris-HCl (pH 8.0), 0.1 mM EDTA, 10% (v/v)  
558 glycerol, 1 mM DTT, 1 mM PMSF. Nucleosome (1.6 μM) was first incubated with increasing  
559 concentration of the mixture of HATs at 30°C for 5 min, followed by the addition of 50 μM acetyl-  
560 CoA for another 30 min at 30°C ([Chatterjee et al., 2011](#)). Western blotting was used to detect the  
561 acetylation efficiency of nucleosome. For large-scale preparation of the acetylated nucleosome, 15N51  
562 nucleosome and HATs were incubated in 1:1 stoichiometry with the reaction performed as mentioned  
563 above. The two HATs were separated from the PBAF-NCP complex during Grafix.

564

## 565 **Complex assembly and gradient fixation**

566 The PBAF-NCP complex was cross-linked and purified using gradient fixation (Grafix) ([Kastner et al., 2008](#)).  
567 In brief, the purified PBAF and acetylated nucleosome 15N51 were mixed at a ratio of 1:1  
568 for 30 min at 4°C followed by the addition of 2 mM MgCl<sub>2</sub>, 0.5 mM ADP, 7 mM NaF, 1 mM BeSO<sub>4</sub>  
569 and incubation by 15 min at 30°C. The assembled sample was loaded onto a gradient generated from  
570 a glycerol light solution containing 15% (v/v) glycerol, 20 mM HEPES pH 7.0, 60 mM KCl, 2 mM

571 MgCl<sub>2</sub>, 0.5 mM ADP, 7 mM NaF, 1 mM BeSO<sub>4</sub>, 2 mM DTT and a glycerol heavy solution containing  
572 35% (v/v) glycerol, 20 mM HEPES pH 7.0, 60 mM KCl, 2 mM MgCl<sub>2</sub>, 0.5 mM ADP, 7 mM NaF, 1  
573 mM BeSO<sub>4</sub>, 2 mM DTT and 0.01% (v/v) glutaraldehyde. The sample was subjected to  
574 ultracentrifugation at 38000 rpm for 15h in an SW41Ti swinging-bucket rotor (Beckman) at 4 °C. The  
575 peak fractions of the cross-linked PBAF-NCP complex was concentrated and dialyzed overnight  
576 against a buffer containing 20 mM HEPES pH 7.0, 60 mM KCl, 2 mM MgCl<sub>2</sub>, 0.5 mM ADP, 7 mM  
577 NaF, 1 mM BeSO<sub>4</sub>, 2 mM DTT, followed by cryo-EM grids preparation.

578

### 579 **Cryo-EM sample preparation**

580 For negative staining EM grid preparation, samples (5 µL at a concentration of ~0.06 mg/mL) were  
581 applied onto glow-discharged copper grids supported by a continuous thin layer of carbon film for 60  
582 s before negative staining by 2% (w/v) Uranyl Acetate solution at room temperature. The grids were  
583 prepared in the Ar/O<sub>2</sub> mixture for 15 s using a Gatan 950 Solarus plasma cleaning system with a power  
584 of 35 W. The negatively stained grids were loaded onto a Thermo Fisher Scientific Talos L120C  
585 microscope equipped with a Ceta CCD camera and operated at 120 kV at a nominal magnification of  
586 92,000 x, corresponding to a pixel size of 1.58 Å on the specimen.

587 For cryo-EM grid preparation, samples (4 µL at a concentration of ~0.6 mg/mL) were applied to freshly  
588 glow-discharged Quantifoil R1.2/1.3 holey carbon grids. After incubation for 5 s at 6 °C and 100%  
589 humidity, the grids were blotted for 1 s with blot force 2 in a Thermo Fisher Scientific Vitrobot Mark  
590 IV and plunge-frozen in liquid ethane at liquid nitrogen temperature. The grids were prepared in the  
591 H<sub>2</sub>/O<sub>2</sub> mixture for 60 s using a Gatan 950 Solarus plasma cleaning system with a power of 5 W. The ø  
592 55/20 mm blotting paper is made by TED PELLA used for plunge freezing.

593

### 594 **Cryo-EM data collection**

595 The cryo-EM grids were loaded onto a Thermo Fisher Scientific Titan Krios transmission electron  
596 microscope operated at 300 kV for data collection. Cryo-EM images were automatically recorded by  
597 a post-GIF Gatan K3 Summit direct electron detector in the super-resolution counting mode using  
598 Serial-EM with a nominal magnification of 64,000 x in the EFTEM mode, which yielded a super-  
599 resolution pixel size of 0.667 Å on the image plane, and with defocus values ranging from -1.0 to -2.5  
600 µm. Each micrograph stack was dose-fractionated to 40 frames with a total electron dose of ~50 e<sup>-</sup>/Å<sup>2</sup>  
601 and a total exposure time of 3.6 s. 9,156 micrographs of PBAF-NCP were collected for further



602 processing.

603

## 604 **Image processing**

605 Movie stacks were corrected for drift and beam-induced motion correction by MotionCor2 ([Zheng et](#)  
606 [al., 2017](#)) with binned 2-fold to a calibrated pixel size of 1.334 Å/pixel, which generated drift-corrected  
607 summed micrographs with and without electron-dose weighting. The defocus values were estimated  
608 by Gctf ([Zhang, 2016](#)) from non-dose-weighted summed images. Other procedures of cryo-EM data  
609 processing were performed within RELION v3.0 ([Kimanius et al., 2016](#); [Scheres, 2012](#)) and  
610 cryoSPARC v3 ([Punjani et al., 2017](#)) using the dose-weighted micrographs.

611 Particles were automatically picked and subjected to reference-free 2D classification, yielding a total  
612 of 2,071,055 particles. The particles were further subjected to the 3D classifications. The classes with  
613 good quality consisted of 254,834 particles and were subsequently subjected to the 3D classification  
614 with Base module mask. And 92,526 particles were selected from good 3D classes, which were used  
615 for 3D classification in cryoSPARC v3. A final set of 37,528 homogeneous PBAF-NCP complex  
616 particles were selected to perform a final 3D reconstruction in cryoSPARC, yielding a reconstruction  
617 of PBAF-NCP complex at 4.4 Å resolution. Local refinement focused on the Core module with mask  
618 could reconstitute the Core module at 3.4 Å resolution. To improve the map quality of the Base module  
619 and the ARP module, the signal of Core module was subtracted from two classes of 3D classification  
620 containing 81,287 particles. The subtracted particles were further subjected to 2D classification,  
621 yielding 76,554 particles after clearance. A further 3D classification by applying mask for the ARP  
622 module and the Base module resulted in a clean dataset containing 31,995 particles. The resulting  
623 particles were refinement in cryoSPARC, yielding a reconstruction of ARP and Base module at 4.2 Å  
624 resolution. Local refinement focused on the ARP module and the Base module with mask generated  
625 reconstructions of the ARP module and the Base module at 5.4 Å and 4.1 Å, respectively.

626 All reported resolutions are based on the gold-standard Fourier shell correlation (FSC) = 0.143  
627 criterion. The GSFSC curves were corrected for the effects of a soft mask with high-resolution noise  
628 substitution. All cryo-EM maps were sharpened by applying a negative B-factor estimation in  
629 cryoSPARC Sharpening Tools. All the visualization and evaluation of the 3D volume map were  
630 performed within UCSF Chimera or UCSF ChimeraX ([Pettersen et al., 2004](#)), and the local resolution  
631 variations were calculated using cryoSPARC.

632

## 633 **Model building and structure refinement**

634 The structures of RSC complex (PDB: 6TDA) ([Eustermann et al., 2018](#); [Wagner et al., 2020](#); [Ye et al.,](#)  
635 [2019](#)), (PDB:6KW4) ([Ye et al., 2019](#)) and structure of BAF complex (PDB:6LTJ) ([He et al., 2020](#))  
636 were used as initial structural templates, which were fitted into the cryo-EM maps by rigid-body fitting  
637 using UCSF Chimera followed by iterative rounds of manual adjustment and rebuilding in COOT  
638 ([Emsley and Cowtan, 2004](#)). The model was finalized by rebuilding in ISOLDE ([Croll, 2018](#)) followed  
639 by refinement in Phenix ([Adams et al., 2002](#)) with secondary structure and geometry restraints using  
640 the cryo-EM maps. Overfitting of the model was monitored by refining the model in one of the two  
641 half maps from the gold-standard refinement approach and testing the refined model against the other  
642 map. Statistics of the map reconstruction and model refinement can be found in Extended Data Table  
643 1. The final structural model was validated using Phenix. Map and model representations in the figures  
644 and movies were prepared by PyMOL (<https://pymol.org/>), UCSF Chimera or UCSF ChimeraX.

645

## 646 **Cross-linking and mass spectrometry analysis**

647 The Cross-linking Mass Spectrometry (XL-MS) analysis was performed as previously described  
648 ([Chen et al., 2021](#)). The purified PBAF complex (0.45  $\mu$ M) was incubated with nucleosome at a ratio  
649 of 1:1 in the presence of ADP-BeF<sub>3</sub> followed by cross-linking MS analyses. The PBAF-NCP complex  
650 was incubated with DSS (250  $\mu$ M) at 25°C with shaking at 500 rpm (ThermoMixer) for 1 h. Reaction  
651 was terminated by adding 20 mM ammonium bicarbonate (Sigma). The cross-linked sample was  
652 precipitated with cooled acetone and dried in a speed vac. The pellet was dissolved in 8 M Urea, 100  
653 mM Tris-HCl pH 8.5, followed by TCEP reduction, iodoacetamide (Sigma) alkylation, and trypsin  
654 (Promega) digestion overnight at 37°C using a protein/enzyme ratio of 50:1 (w/w). Tryptic peptides  
655 were desalted with Pierce C18 spin column (GL Sciences) and separated in a proxeon EASY-nLC  
656 liquid chromatography system by applying a step-wise gradient of 0-85% acetonitrile (ACN) in 0.1%  
657 formic acid. Peptides eluted from the liquid chromatography were directly electrosprayed into the mass  
658 spectrometer with a distal 2 kV spray voltage. Data-dependent tandem mass spectrometry (MS/MS)  
659 analyses were performed on Thermo Q-Exactive instrument in a 60-minute gradient. The acquired raw  
660 data files were processed with pLink2 software ([Chen et al., 2019](#)) and the results were visualized  
661 using the xiNET online server ([Combe et al., 2015](#)).

662 **Figure Legends**

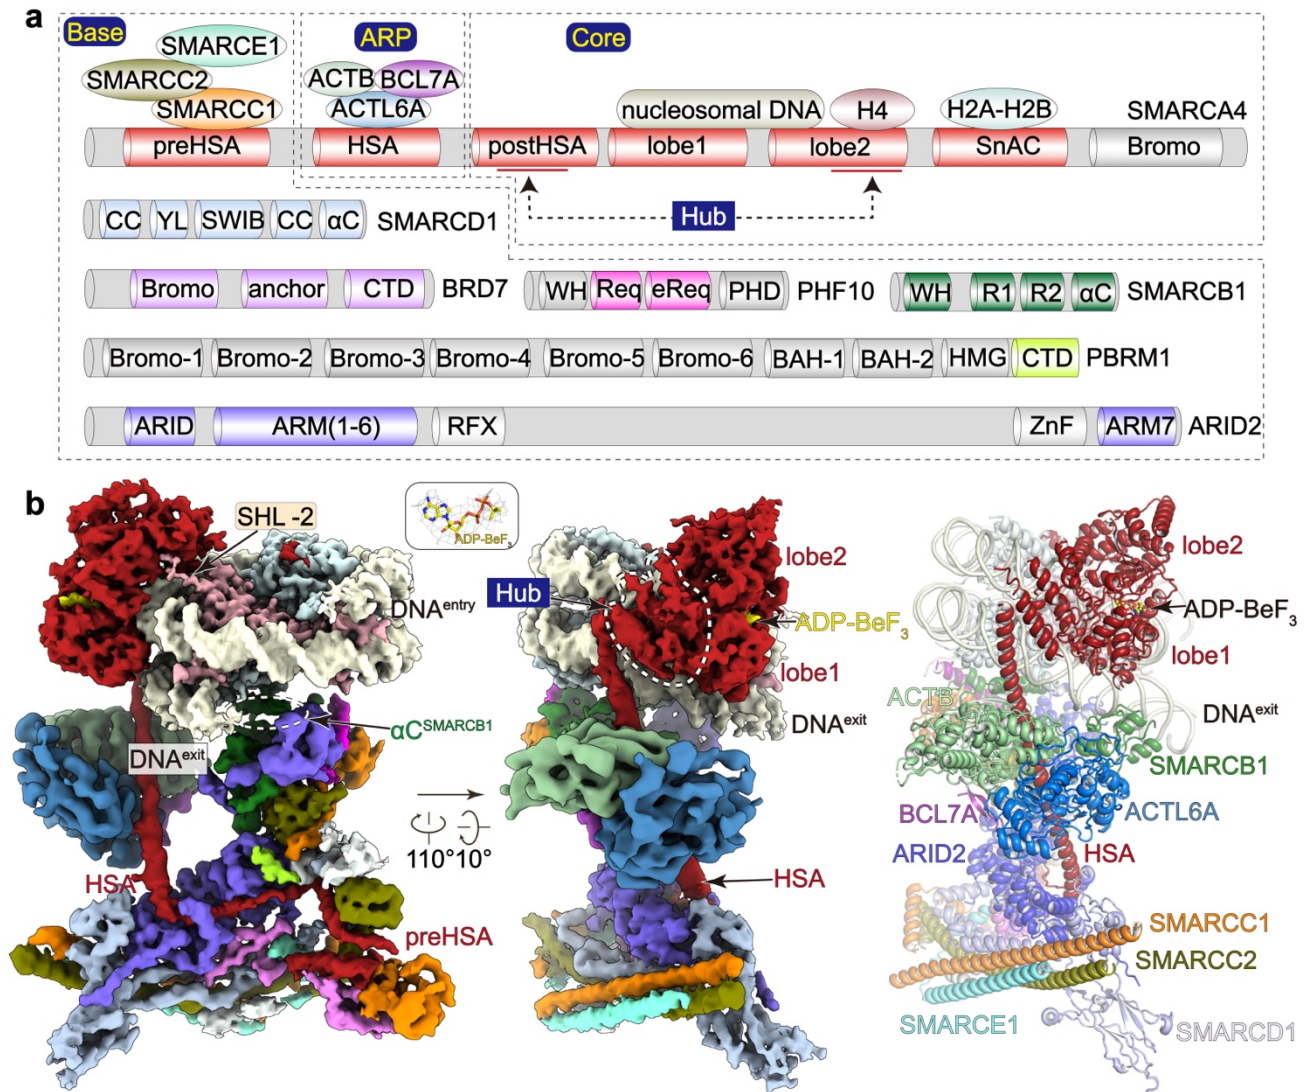

663  
664 **Figure 1. Cryo-EM structure of the nucleosome-bound PBAF.**

665 **(a)** Schematic diagram of the 13-subunit PBAF complex organized into the Base, ARP and  
666 modules. Histone/DNA-binding domains of indicated subunits are shown. Color scheme is used  
667 throughout figures if not elsewhere specified. **(b)** Composite cryo-EM map and structural model of  
668 PBAF-NCP in two different views. Close-up views of ADP-BeF<sub>3</sub> is shown in cryo-EM map (mesh)  
669 and structural models (stick).



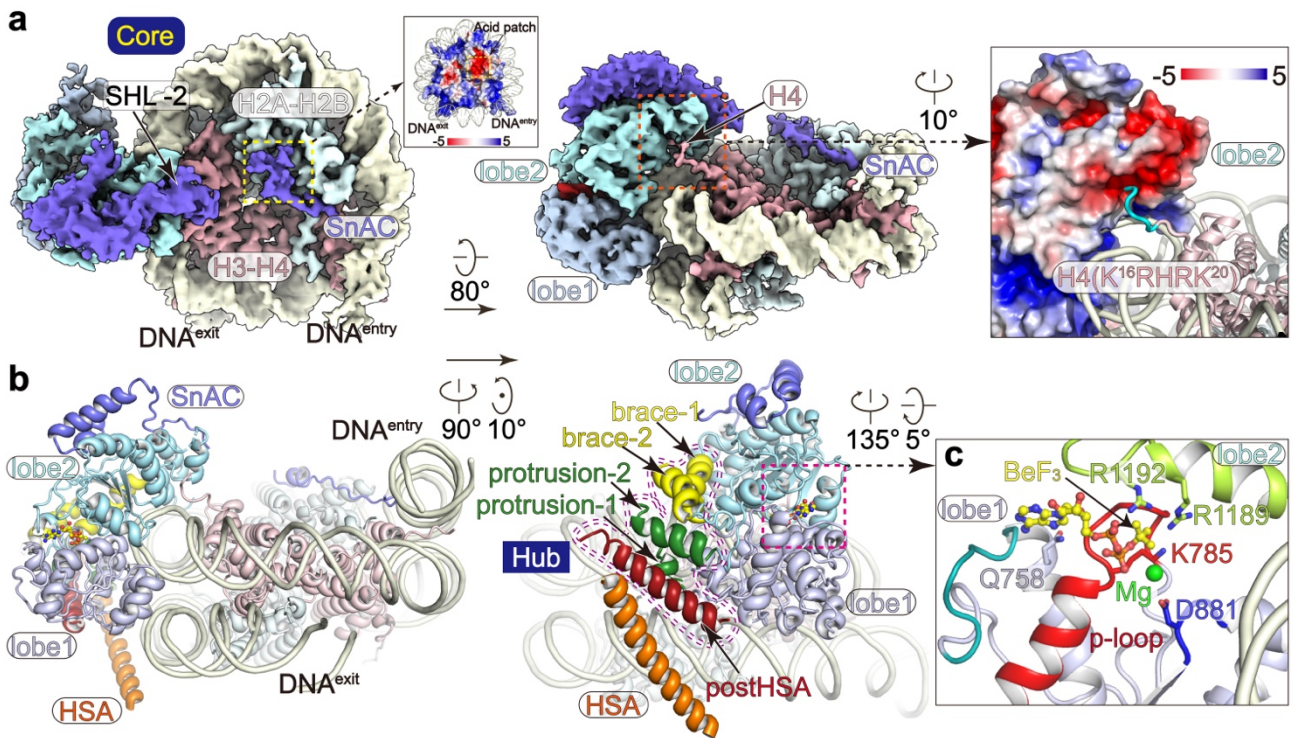

670

671 **Figure 2. Structure of the nucleosome-bound ATPase.**

672 **(a)** Cryo-EM map of the Core module in two different views. Binding of SnAC to histone acidic  
673 surface is highlighted and binding of histone H4 tail to the acidic surface of ATPase lobe2 is shown in  
674 close-up view. **(b)** Structural model of the Core module with the Hub helices indicated. **(c)** Close-up  
675 view of the nucleotide-binding pocket with ADP-BeF<sub>3</sub> and critical residues shown in sticks.

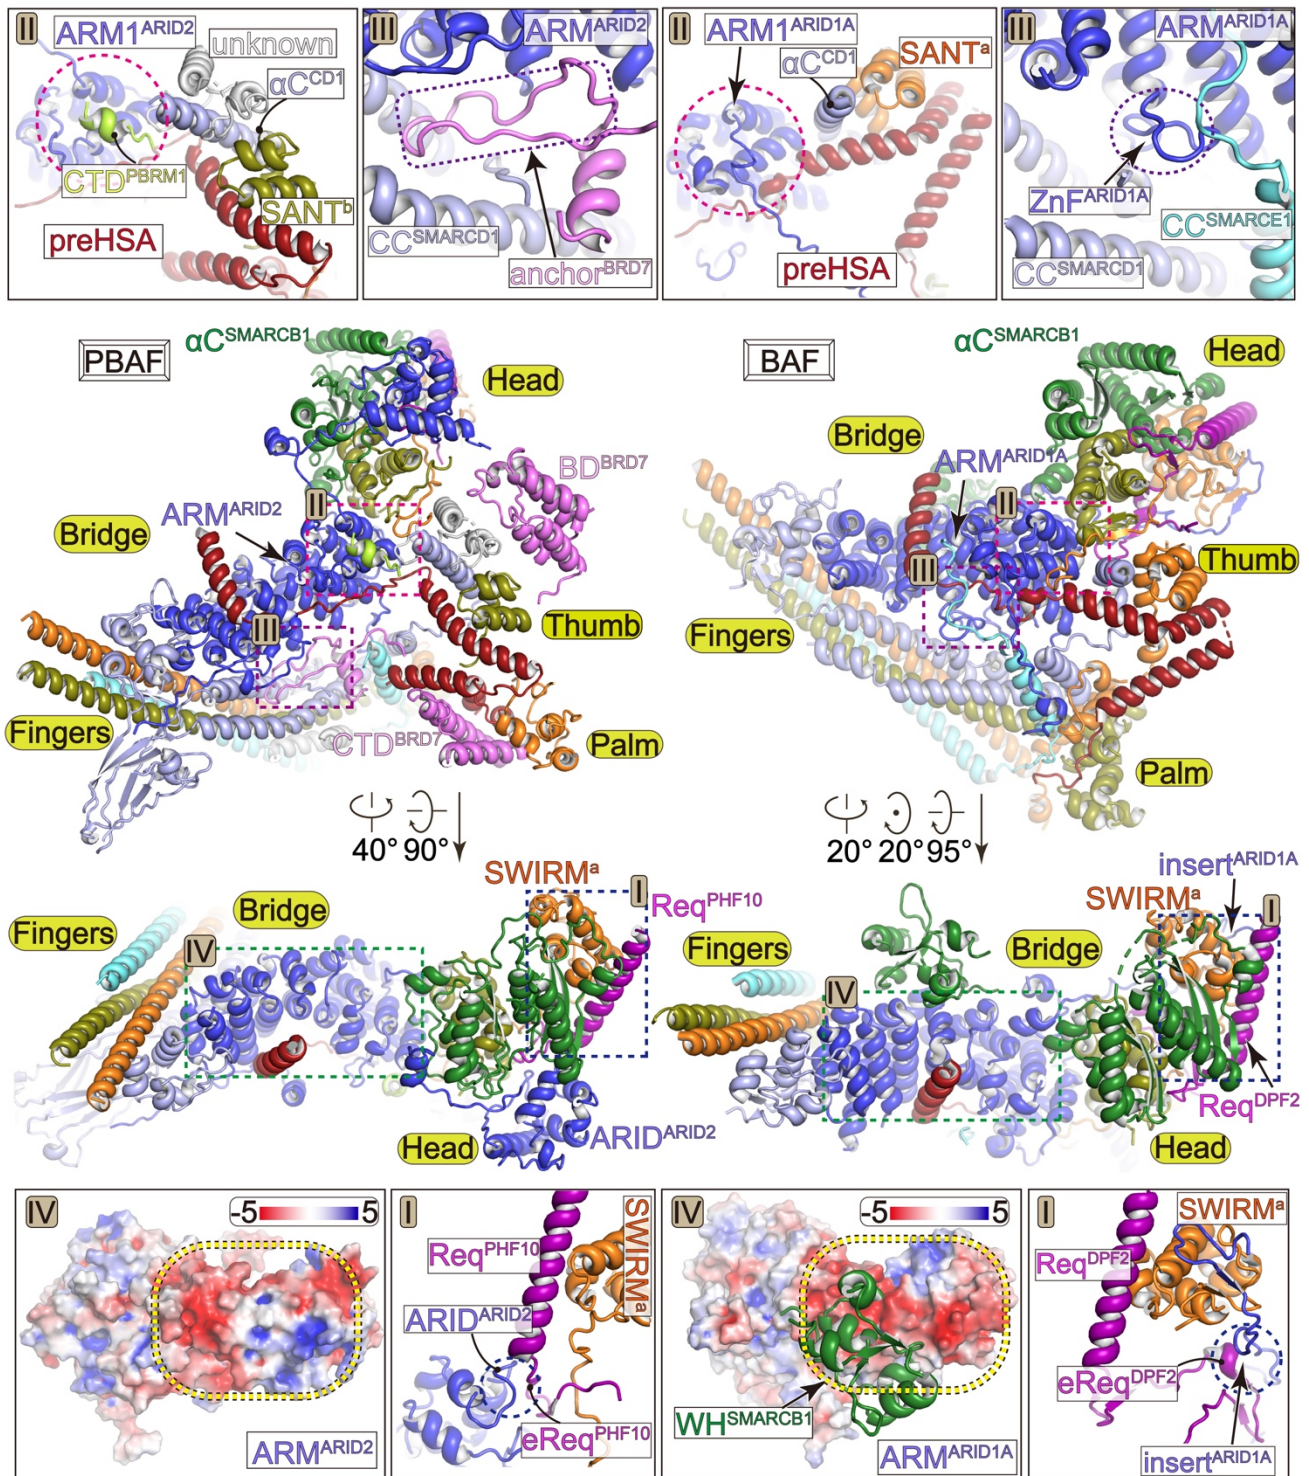

676

677 **Figure 3. PBAF-specific organization of the Base module.**

678 Comparison of the Base modules of PBAF (left panels) and BAF (right panels) in two different views.  
 679 Structural differences at region-I to region-IV are indicated on overall structure and shown in close-  
 680 up views. The differences at equivalent positions are highlighted with dashed circles.



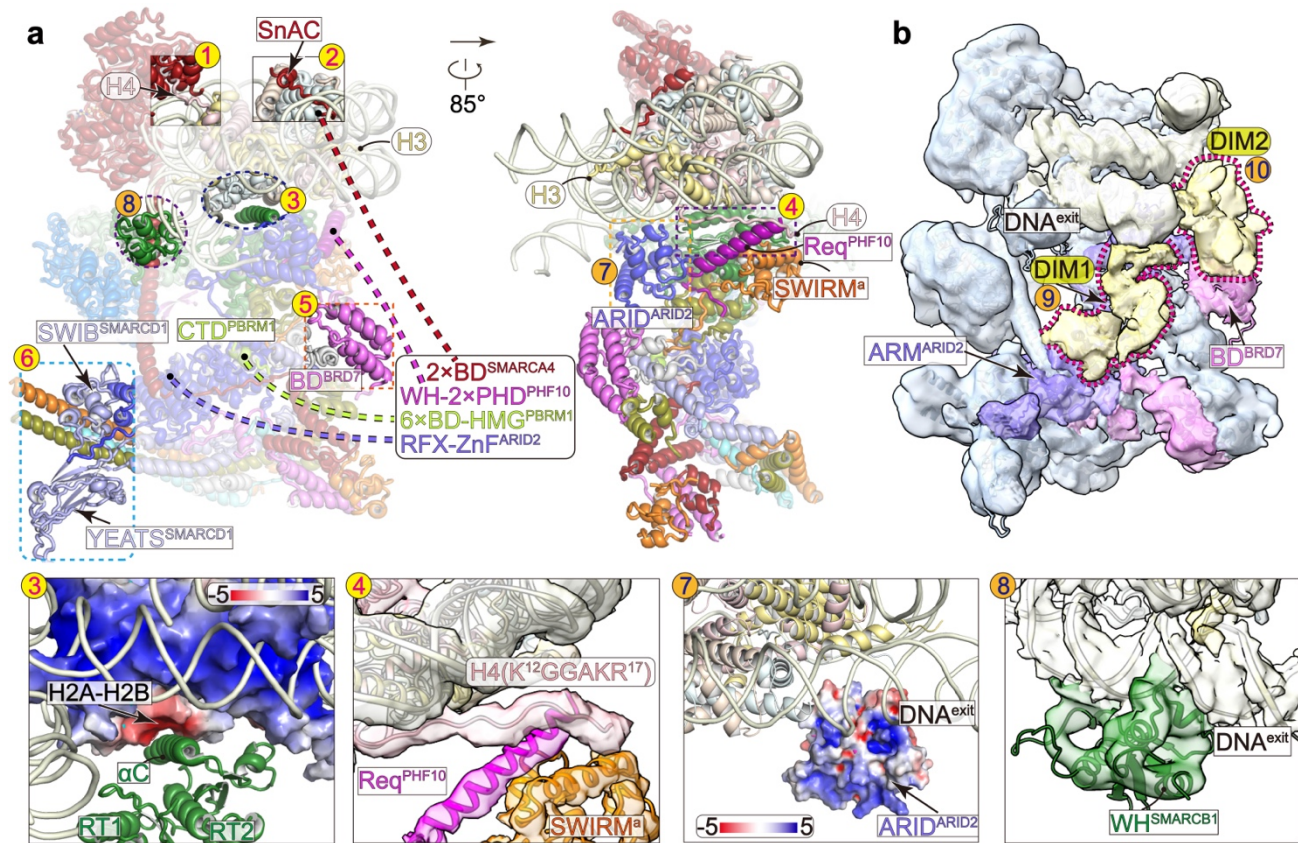

681

682 **Figure 4. Histone/DNA-binding domains/modules.**

683 Structural model (a) and cryo-EM map at low threshold (b) of PBAF-NCP with the positions of  
 684 histone/DNA-binding domains/modules indicated with numbers. Numbers 1 to 6 in yellow balls  
 685 indicate the histone-binding domains and 7 to 10 in orange balls indicate the DNA-binding  
 686 domains/modules. Invisible domains are connected with dashed lines to indicate their tethers with  
 687 ordered regions. The bottom panels show close-up views of indicated contacts with involved regions  
 688 shown in transparent cryo-EM map or electrostatic potential surface. Unassigned regions around  
 689 exiting DNA, DIM1 and DIM2, are colored in yellowed and highlight with dashed lariats.

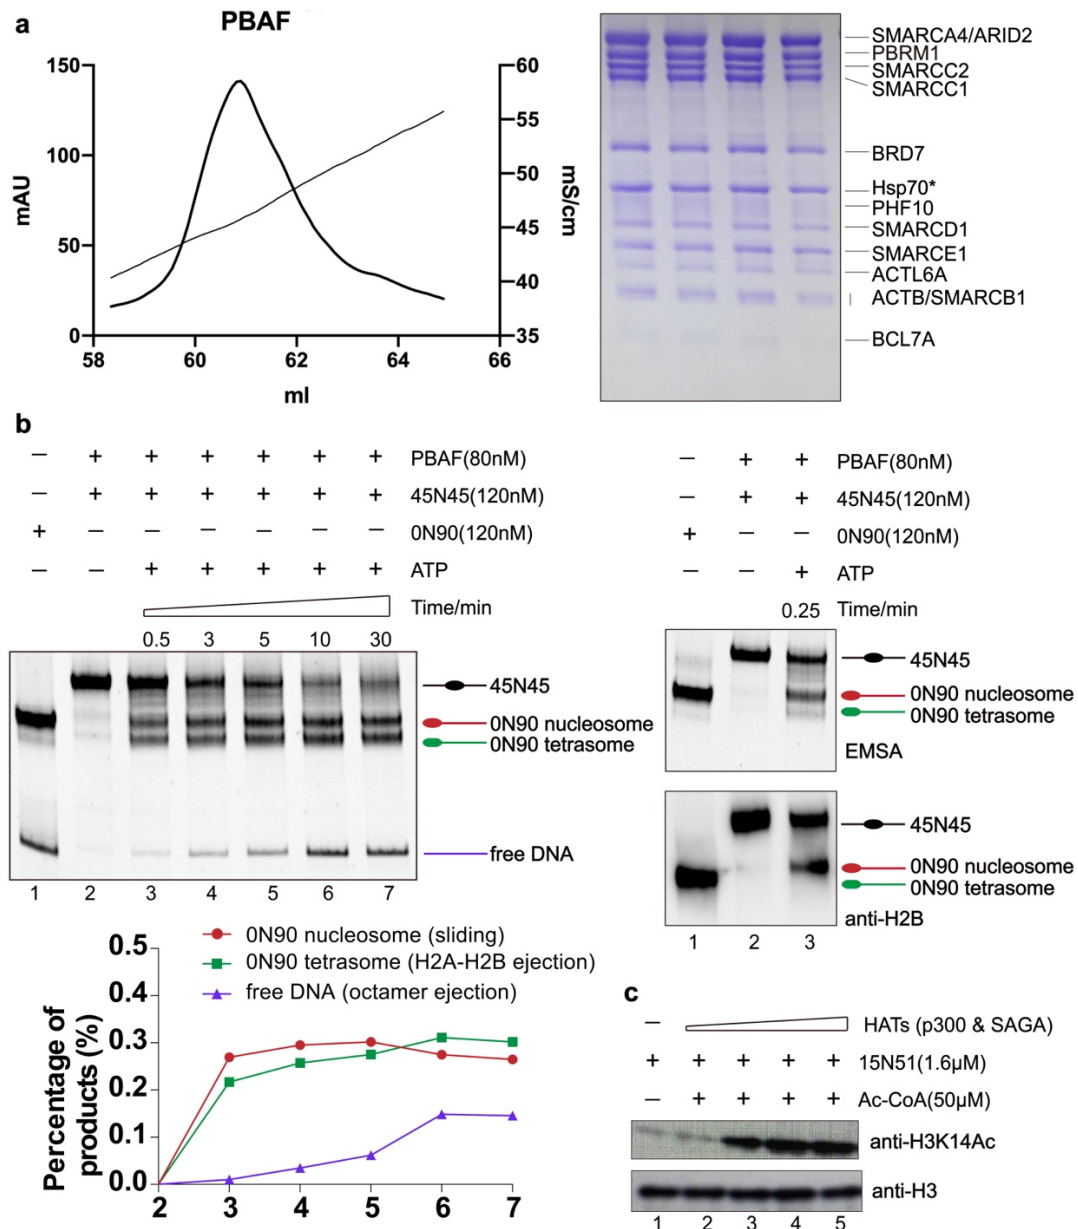

690

691 **Extended Data Figure 1. Protein purification and remodeling activities of PBAF complex.**

692 **(a)** Purification of PBAF complex. Profile of ion-exchange purification of the 13-subunit PBAF  
 693 complex. Peak fractions were subjected to SDS-PAGE followed by Coomassie blue staining. **(b)** In  
 694 vitro chromatin remodeling assay shows nucleosome sliding and ejection activities of PBAF.  
 695 Reconstituted nucleosome ON90 serves as a reference for an end-positioned nucleosome, the product  
 696 of chromatin sliding reaction. The generated ON90 tetrasome represents the product of H2A-H2B  
 697 ejection with the ejection of H2A-H2B dimer confirmed using antibody against histone H2B. Free  
 698 DNA represents the product of histone octamer ejection. **(c)** In vitro acetylation of nucleosome by  
 699 increasing concentration of a mixture of two acetyltransferases, p300 and SAGA acetyltransferase  
 700 subcomplex. The level of acetylation was detected using antibody against acetylated histone H3K14.

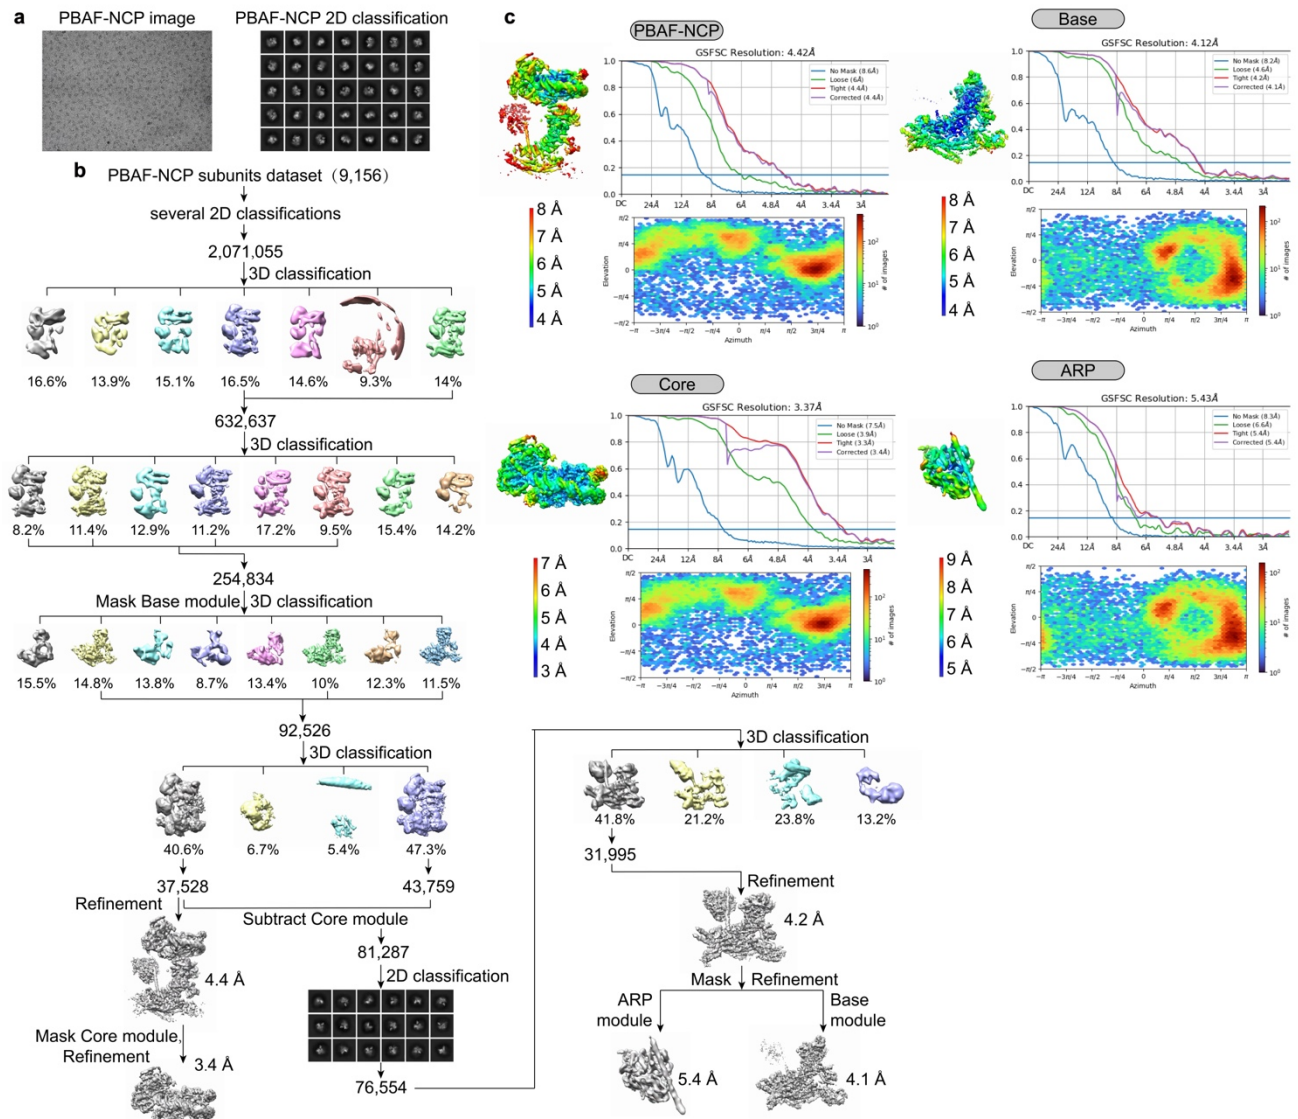

701

702 **Extended Data Figure 2. Data collection and image processing of PBAF-NCP complexes.**

703 (a-b) Representative cryo-EM images, 2D classification (b) and flow-charts of the cryo-EM image

704 processing (b) of PBAF-NCP sample. (c) Local resolution estimation, GSFSC curves and direction

705 distribution of the cryo-EM reconstructions of whole complex and the Core, Base and ARP modules.



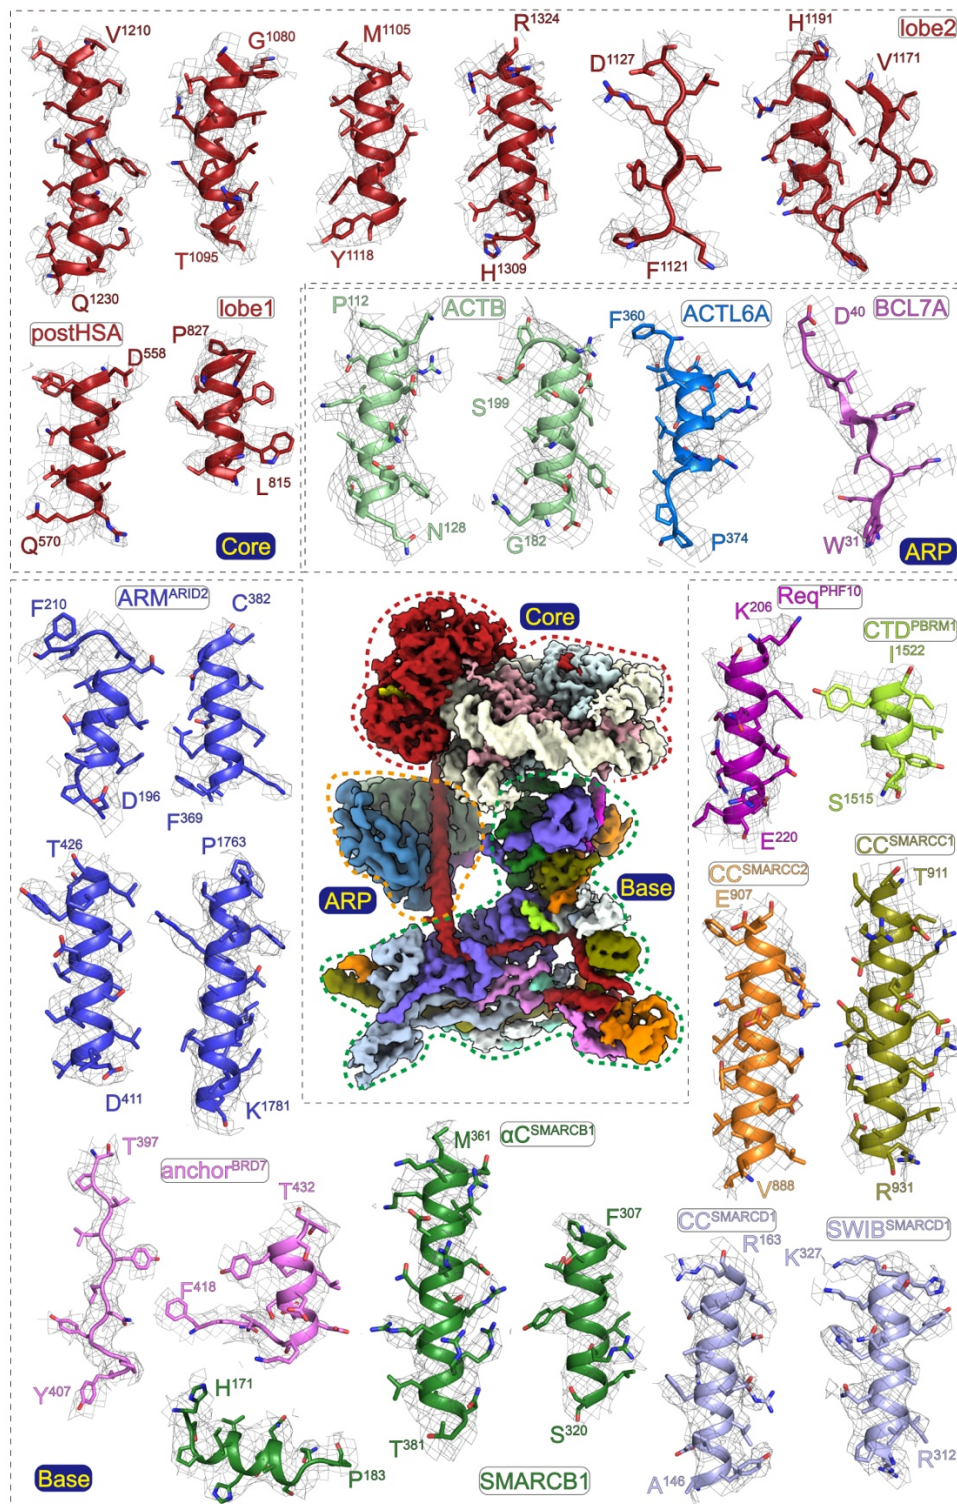

706

707 **Extended Data Figure 3. Cryo-EM map and structural model.**

708 Composite cryo-EM map of the Core module (3.4 Å), Base module (4.1 Å), and ARP module (5.4 Å).  
 709 Representative regions of PBAF subunits are shown in close-up views. Structural models shown in  
 710 sticks representation are well covered by cryo-EM maps in meshes, supporting that the model was  
 711 built correctly.

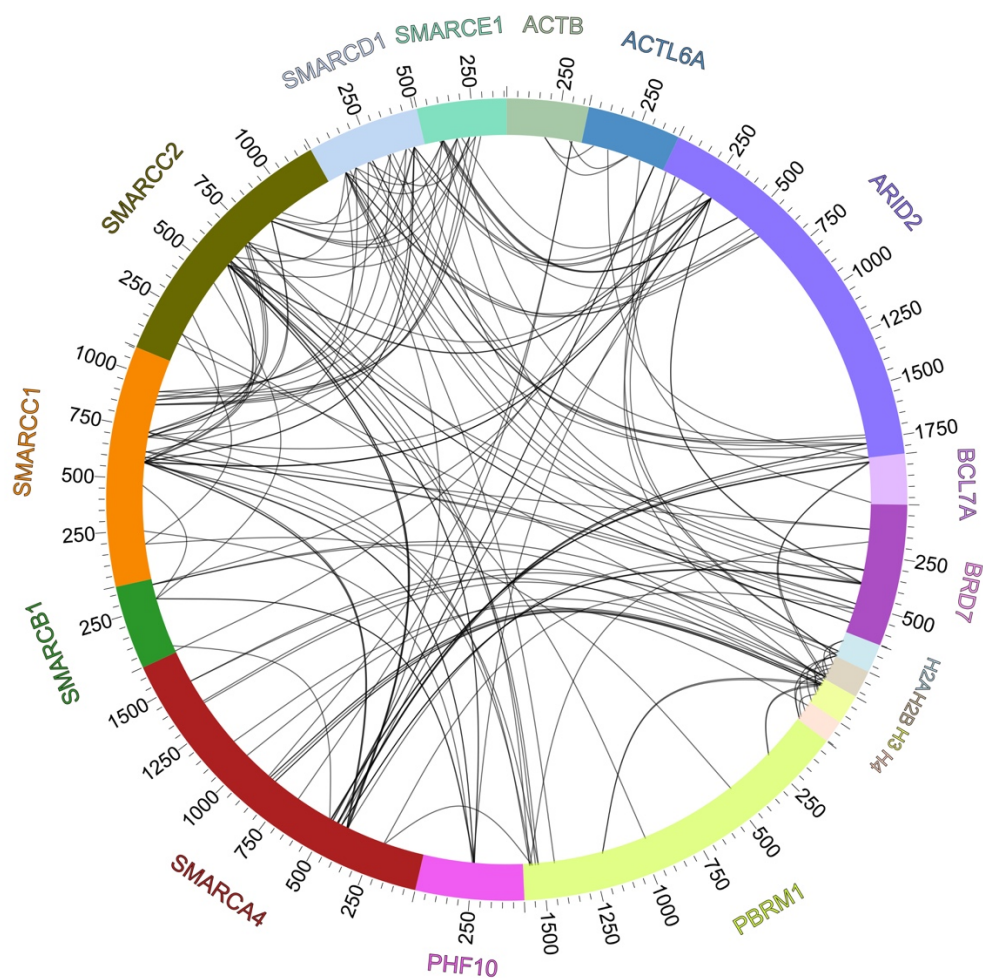

712

713 **Extended Data Figure 4. Cross-linking mass spectrometry.**

714 Schematic representation of inter-subunit cross-links within the PBAF-NCP complex in the presence  
715 of ADP-BeF<sub>3</sub>. Intramolecular cross-links were omitted for simplicity.

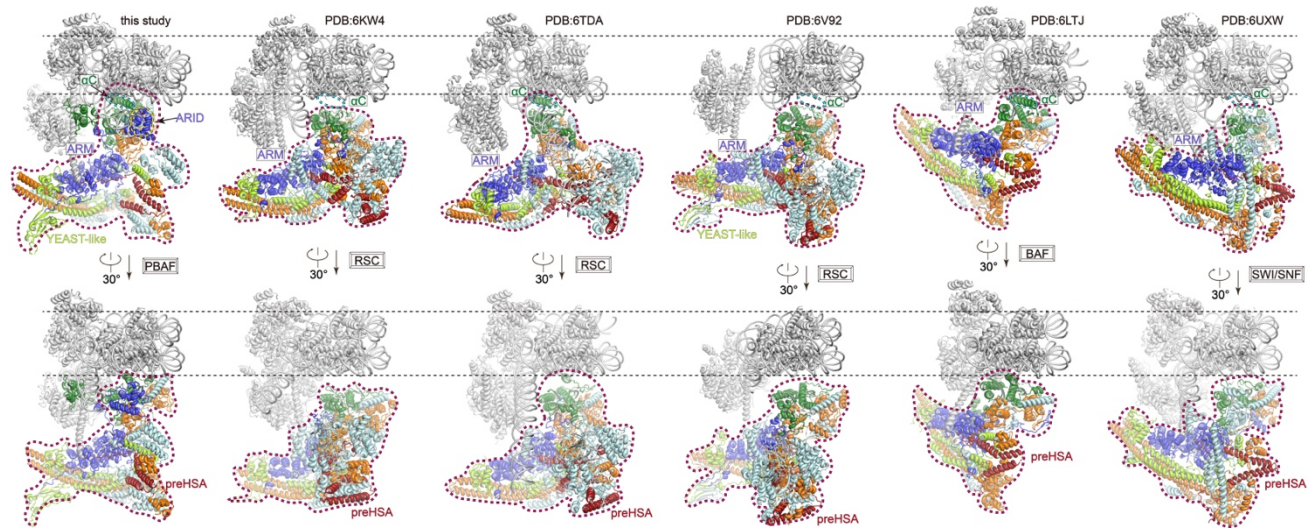

717 **Extended Data Figure 5. Structural comparison of nucleosome-bound human PBAF and other**  
718 **SWI/SNF family complexes.**

719 Two different views of the structures of nucleosome-bound human PBAF (this study), yeast RSC  
720 (PDB ID: 6KW4) ([Ye et al., 2019](#)), yeast RSC (PDB ID: 6TDA) ([Wagner et al., 2020](#)), yeast RSC  
721 (PDB ID: 6V92) ([Patel et al., 2019](#)), human BAF (PDB ID: 6LTJ) ([He et al., 2020](#)), and yeast  
722 SWI/SNF (PDB ID: 6UXW) ([Han et al., 2020](#)). The structures are shown with nucleosome in a similar  
723 orientation for comparison. Equivalent subunits are colored in the same color scheme.



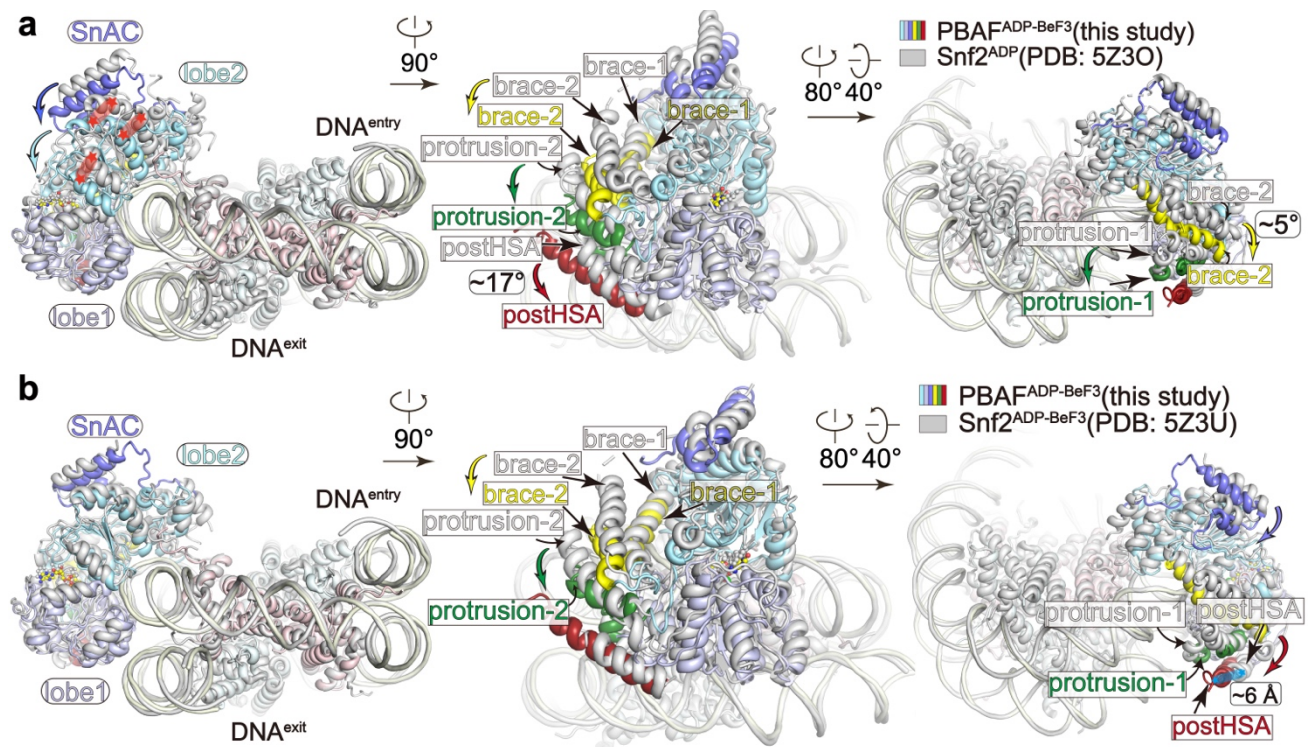

724

725 **Extended Data Figure 6. Nucleosome-bound ATPase in PBAF complex and isolated Snf2.**

726 Structural comparison of the nucleosome-bound ATPase in PBAF complex (ADP-BeF<sub>3</sub>-bound) and  
727 isolated Snf2 ATPase (Li et al., 2019) in the ADP-bound (a) and ADP-BeF<sub>3</sub>-bound (b),  
728 respectively. The structures are shown with nucleosome superimposed with structural differences  
729 indicated with arrows. Structure of Snf2-NCP is colored in grey and that of PBAF-NCP is colored as  
730 indicated.

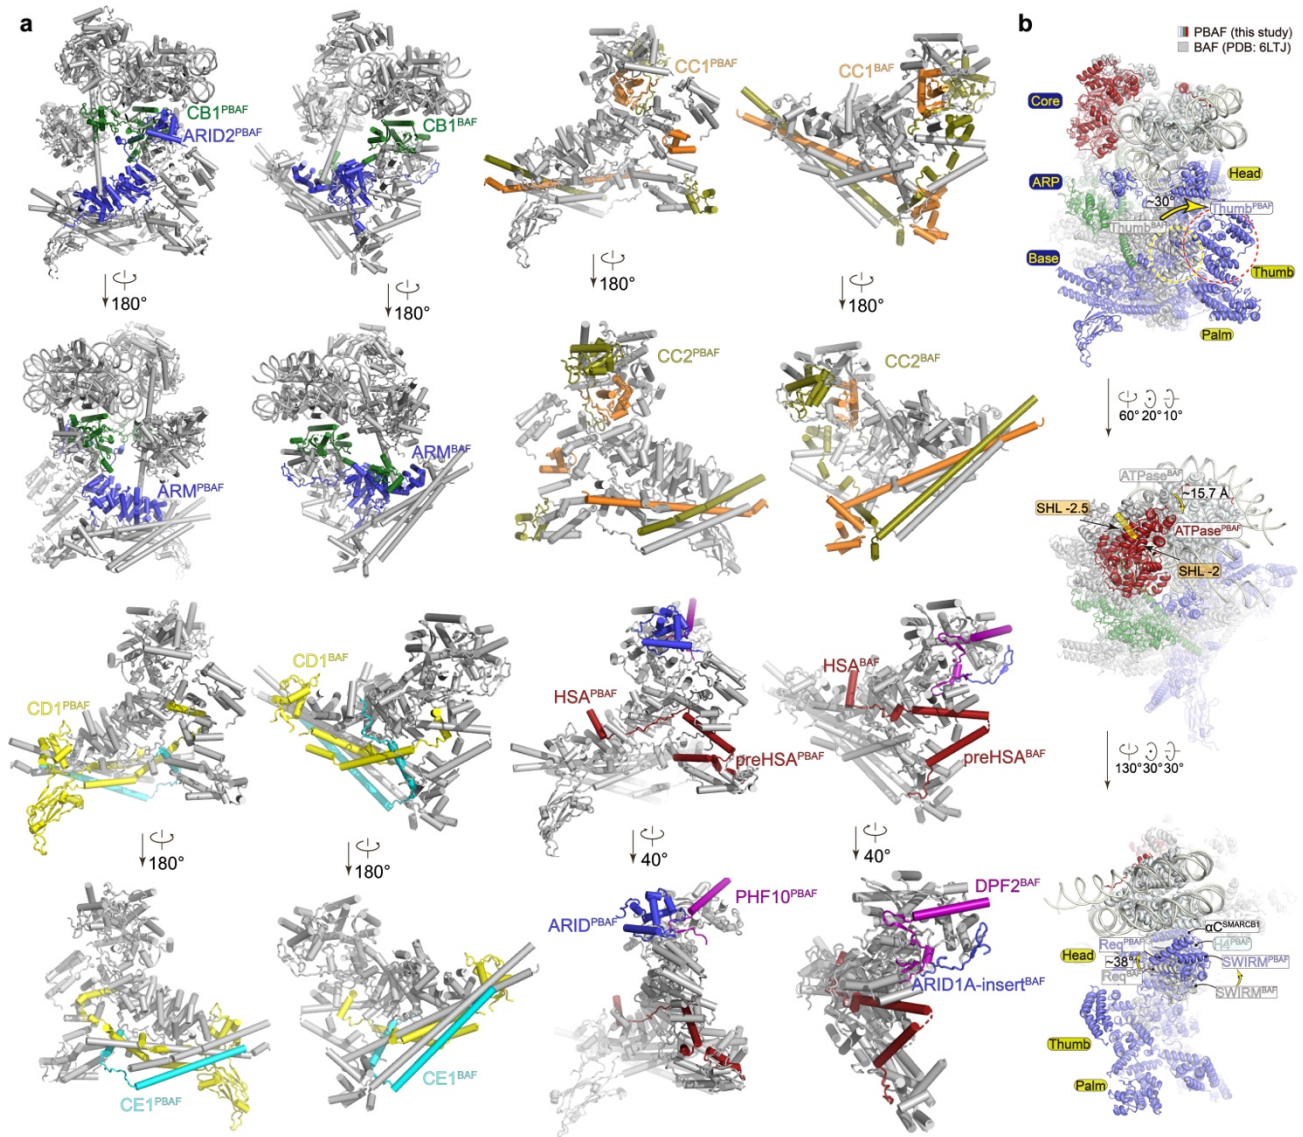

731

732 **Extended Data Figure 7. Structural differences in PBAF-NCP and BAF-NCP.**

733 (a) Structural comparison of PBAF-NCP (left panels) and BAF-NCP (right panels) structures with  
 734 each subunit highlighted for comparison. (b) Superimposition of the two structures in three different  
 735 views. Structural differences are indicated with arrows.



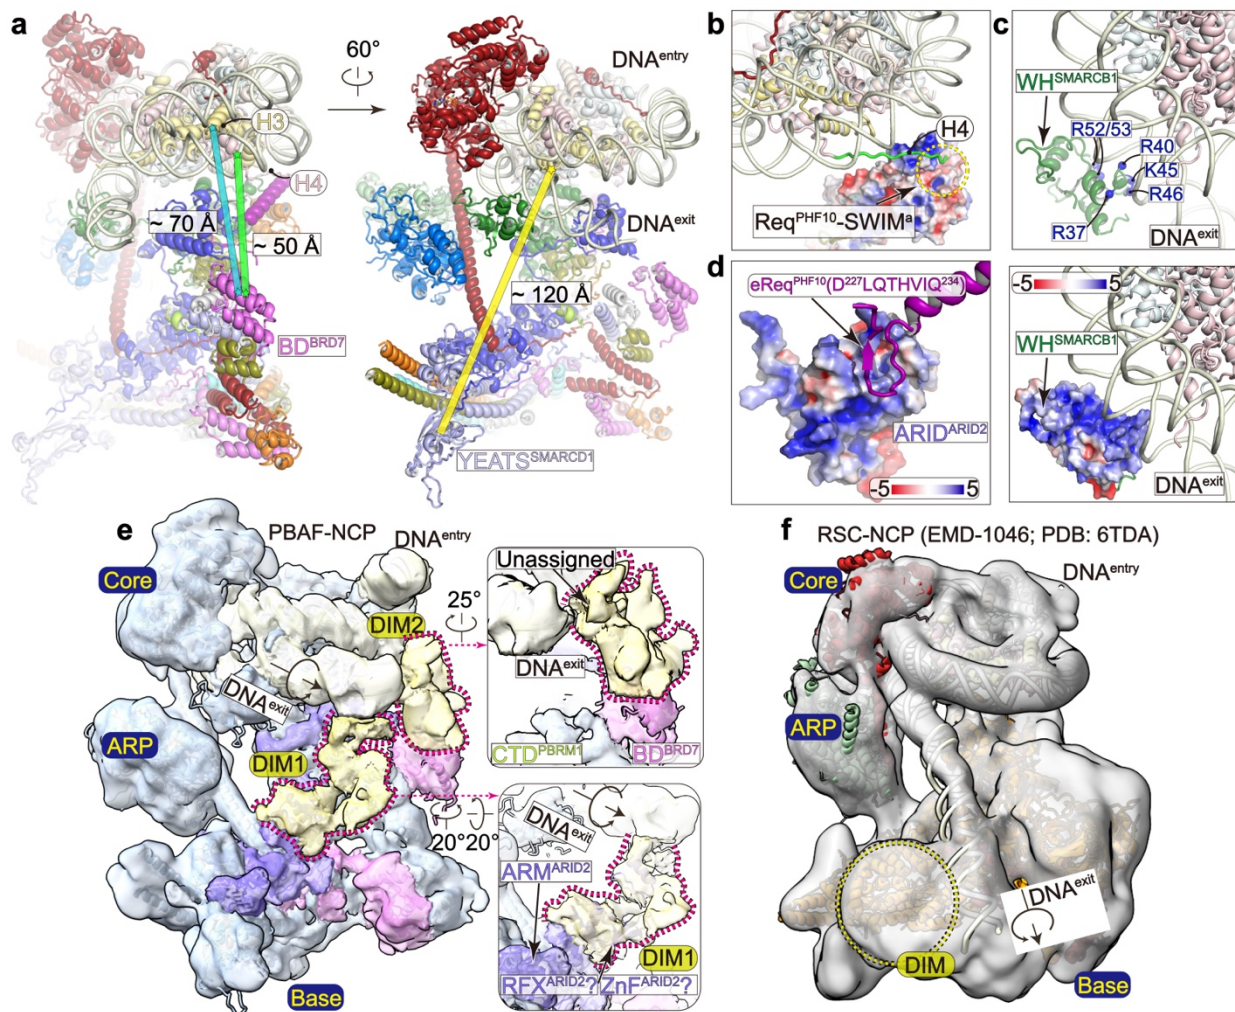

736

737 **Extended Data Figure 8. Positions of histone/DNA-binding domains in PBAF-NCP.**

738 (a) Overall structural model of PBAF-NCP in two different views. Distances between the  
 739 bromodomain of BRD7 and histone fold domains of the nearest histone H3 and H4 are indicated  
 740 in the left panel. Distance between YEATS-like domain of SMARCD1 and histone octamer is indicated  
 741 in the right panel. (b) Close-up view of the contacts between histone H4 tail (shown in cartoon) and  
 742 Req<sup>PHF10</sup>-SWIRM<sup>SMARCC</sup> dimer. The acidic surface of Req<sup>PHF10</sup>-SWIRM<sup>SMARCC</sup> is shown in  
 743 electrostatic potential surface. (c) Close-up view of the interaction between WH<sup>SMARCB1</sup> and  
 744 nucleosomal DNA. Positively charged residues of WH<sup>SMARCB1</sup> are indicated with blue balls in the  
 745 upper panel. Positively charged surface of WH<sup>SMARCB1</sup> is indicated with electrostatic potential surface  
 746 in the lower panel. (d) Interaction between ARID<sup>ARID2</sup> and PHF10. (e) Cryo-EM map of PBAF-NCP  
 747 at low threshold shows unassigned regions of DIM1 and DIM2 that bind extranucleosomal DNA.  
 748 Predicted structural model of RFX domain of ARID2 could be placed in the density of DIM1. (f) Cryo-  
 749 EM map of RSC-NCP shows interaction between an unassigned DIM region and extranucleosomal  
 750 DNA.

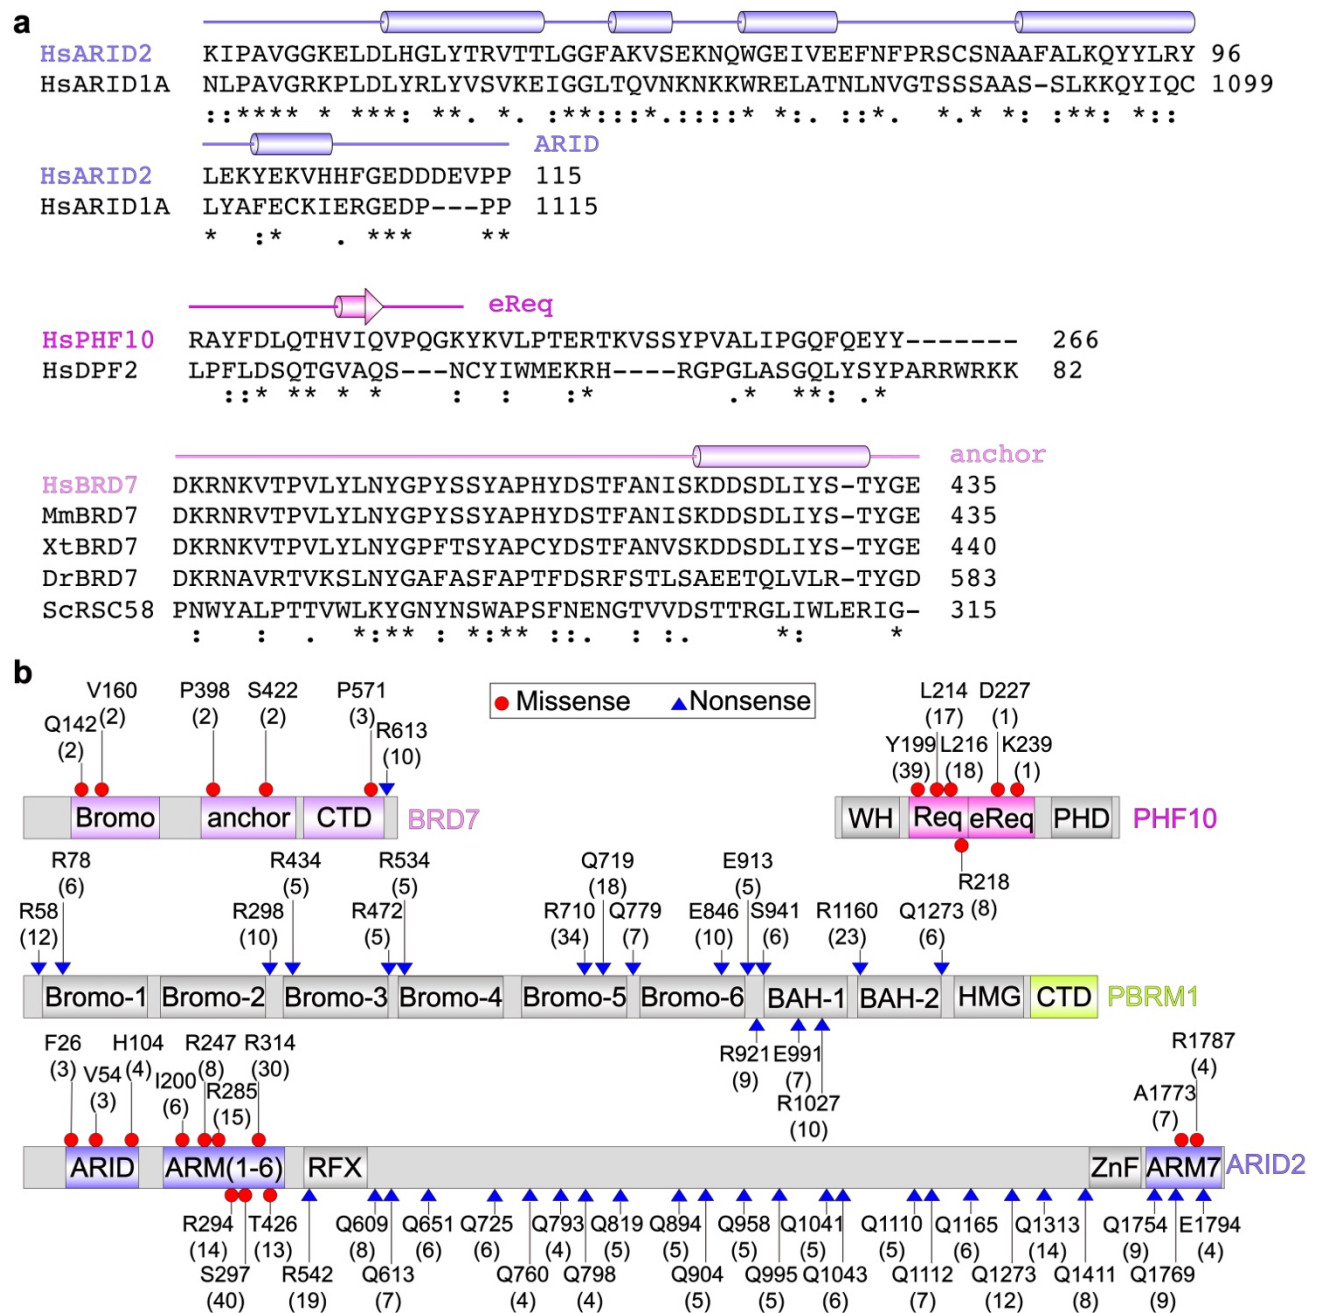

751

752 **Extended Data Figure 9. Sequence analysis of PBAF-specific organization and cancer-derived**  
 753 **mutations.**

754 (a) Sequence analyses of PBAF-specific subunits with critical regions shown for comparison. (b)

755 Cancer-derived mutations of PBAF-specific subunits.

756 **Extended Data Table 1. Statistics of cryo-EM data collection and refinement.**

|                                                     | <b>PBAF-NCP<br/>(EMDB-XX)<br/>(PDB-XX)</b> | <b>Base Module</b> | <b>ARP Module</b> | <b>Core Module</b>                       |
|-----------------------------------------------------|--------------------------------------------|--------------------|-------------------|------------------------------------------|
| <b>Data collection and processing</b>               |                                            |                    |                   |                                          |
| Magnification                                       | 64,000 x                                   | 64,000 x           | 64,000 x          | 64,000 x                                 |
| Voltage (kV)                                        | 300                                        | 300                | 300               | 300                                      |
| Electron exposure (e <sup>-</sup> /Å <sup>2</sup> ) | 50                                         | 50                 | 50                | 50                                       |
| Defocus range (μm)                                  | -1.0 ~ -2.5                                | -1.0 ~ -2.5        | -1.0 ~ -2.5       | -1.0 ~ -2.5                              |
| Pixel size (Å)                                      | 1.334                                      | 1.334              | 1.334             | 1.334                                    |
| Symmetry imposed                                    | C1                                         | C1                 | C1                | C1                                       |
| Initial particle images (no.)                       | 2,071,055                                  | 2,071,055          | 2,071,055         | 2,071,055                                |
| Final particle images (no.)                         | 43,759                                     | 31,995             | 31,995            | 43,759                                   |
| Map resolution                                      | 4.4                                        | 4.1                | 5.4               | 3.4                                      |
| FSC threshold                                       | 0.143                                      | 0.143              | 0.143             | 0.143                                    |
| Map resolution range (Å)                            | 4.0-8.0                                    | 4.0-8.0            | 5.0-9.0           | 3.0-7.0                                  |
| <b>Refinement</b>                                   |                                            |                    |                   |                                          |
| Model resolution (Å)                                | 4.43                                       | 4.06               | 5.36              | 3.37                                     |
| FSC threshold                                       | 0.143                                      | 0.143              | 0.143             | 0.143                                    |
| <b>Model composition</b>                            |                                            |                    |                   |                                          |
| Non-hydrogen atoms                                  | 43,226                                     | 17,473             | 6,462             | 18,038                                   |
| Protein residues                                    | 4,581                                      | 2,205              | 815               | 1,402                                    |
| Nucleotide residues                                 | 330                                        | -                  | -                 | 330                                      |
| Ligands                                             | 1× ADP,<br>1× Mg,<br>1× BeF <sub>3</sub>   | -                  | -                 | 1× ADP,<br>1× Mg,<br>1× BeF <sub>3</sub> |
| <b>B factors (Å<sup>2</sup>)</b>                    |                                            |                    |                   |                                          |
| Protein                                             | 104.09                                     | 183.4              | 107.69            | 57.50                                    |
| Nucleotide                                          | 90.46                                      | -                  | -                 | 90.46                                    |
| Ligand                                              | 20.04                                      | -                  | -                 | 20.04                                    |
| <b>R.m.s deviations</b>                             |                                            |                    |                   |                                          |
| Bond lengths (Å)                                    | 0.004                                      | 0.004              | 0.003             | 0.003                                    |
| Bond angles (°)                                     | 0.850                                      | 0.876              | 0.901             | 0.552                                    |
| <b>Validation</b>                                   |                                            |                    |                   |                                          |
| MolProbity score                                    | 1.93                                       | 1.84               | 1.84              | 1.73                                     |
| Clash score                                         | 11.22                                      | 7.85               | 10.12             | 10.65                                    |
| Poor rotamers (%)                                   | 0.31                                       | 0.05               | 0.00              | 0.51                                     |
| <b>Ramachandran plot</b>                            |                                            |                    |                   |                                          |
| Favored (%)                                         | 94.79                                      | 93.73              | 95.48             | 96.93                                    |
| Allowed (%)                                         | 5.07                                       | 6.27               | 4.52              | 3.07                                     |
| Disallowed (%)                                      | 0.13                                       | 0.00               | 0.00              | 0.00                                     |

757



758 **Supplementary Video 1**

759 Composite cryo-EM map and structural model of PBAF-NCP.

760 **Supplementary Video 2**

761 Cryo-EM map of PBAF-NCP at low threshold showing unassigned regions of DIM1 and DIM2.

762 **Supplementary Video 3**

763 Structural comparison of PBAF-NCP (colored) and BAF-NCP (grey) with nucleosome superimposed.
